# Supplementary material for: Chronostratigraphic framework and provenance of the Ossa-Morena Zone Carboniferous basins (southwest Iberia)
Source: Copernicus journal article supplement (doi:10.5194/se-11-1291-2020), 2020-07-09
Supplement: Supplementary file 1 [file se-11-1291-2020-supplement.zip]

## Kolmogorov-Smirnov Test

### All ages

| K-S P-values using error in the CDF |       |       |       |       |          |       |       |       |        |        |           |       |       |
|-------------------------------------|-------|-------|-------|-------|----------|-------|-------|-------|--------|--------|-----------|-------|-------|
|                                     | TM-3  | CB    | SS1   | SS2   | SS upper | MT    | MR    | BJ    | PQ-TRC | SI-REP | P-G-R-A-R | HT    | OMZ   |
| TM-3                                |       | 0,000 | 0,000 | 0,399 | 0,004    | 0,000 | 0,761 | 0,458 | 0,496  | 0,308  | 0,003     | 0,000 | 0,003 |
| CB                                  | 0,731 |       | 0,003 | 0,000 | 0,000    | 0,150 | 0,000 | 0,000 | 0,000  | 0,000  | 0,000     | 0,000 | 0,000 |
| SS1                                 | 0,637 | 0,330 |       | 0,000 | 0,000    | 0,049 | 0,000 | 0,000 | 0,000  | 0,000  | 0,000     | 0,000 | 0,000 |
| SS2                                 | 0,195 | 0,552 | 0,465 |       | 0,169    | 0,000 | 0,856 | 0,001 | 0,038  | 0,156  | 0,000     | 0,000 | 0,000 |
| SS Upper mb.                        | 0,323 | 0,412 | 0,323 | 0,176 |          | 0,000 | 0,000 | 0,000 | 0,000  | 0,000  | 0,000     | 0,000 | 0,000 |
| MT                                  | 0,608 | 0,183 | 0,200 | 0,511 | 0,358    |       | 0,000 | 0,000 | 0,000  | 0,000  | 0,000     | 0,000 | 0,000 |
| MR                                  | 0,122 | 0,617 | 0,522 | 0,096 | 0,215    | 0,538 |       | 0,000 | 0,004  | 0,000  | 0,000     | 0,000 | 0,000 |
| BJ                                  | 0,150 | 0,806 | 0,691 | 0,285 | 0,406    | 0,675 | 0,193 |       | 0,100  | 0,000  | 0,000     | 0,000 | 0,000 |
| PQ-TRC                              | 0,145 | 0,715 | 0,620 | 0,210 | 0,357    | 0,656 | 0,160 | 0,091 |        | 0,000  | 0,000     | 0,000 | 0,000 |
| SI-REP                              | 0,168 | 0,568 | 0,508 | 0,167 | 0,323    | 0,514 | 0,199 | 0,245 | 0,177  |        | 0,000     | 0,000 | 0,000 |
| P-G-R-A-R                           | 0,304 | 0,871 | 0,781 | 0,336 | 0,473    | 0,818 | 0,292 | 0,173 | 0,163  | 0,308  |           | 0,000 | 0,000 |
| HT                                  | 0,492 | 0,867 | 0,754 | 0,522 | 0,524    | 0,779 | 0,558 | 0,501 | 0,515  | 0,589  | 0,477     |       | 0,000 |
| OMZ                                 | 0,309 | 0,876 | 0,790 | 0,352 | 0,481    | 0,824 | 0,298 | 0,163 | 0,194  | 0,359  | 0,168     | 0,480 |       |

D-values using error in the CDF

P-value>0.05:  
"not significantly different"

0.05>P-value>0.001:  
"not enough significantly different"

P-value≤0.001:  
"significantly different"

### Pre-Carboniferous ages

| K-S P-values using error in the CDF |       |       |       |       |              |       |       |       |        |        |           |       |       |
|-------------------------------------|-------|-------|-------|-------|--------------|-------|-------|-------|--------|--------|-----------|-------|-------|
|                                     | TM-3  | CB    | SS1   | SS2   | SS upper mb. | MT    | MR    | BJ    | PQ-TRC | SI-REP | P-G-R-A-R | HT    | OMZ   |
| TM-3                                |       | 0,000 | 0,003 | 0,411 | 0,074        | 0,000 | 0,044 | 0,387 | 0,308  | 0,487  | 0,003     | 0,000 | 0,003 |
| CB                                  | 0,712 |       | 0,015 | 0,000 | 0,000        | 0,051 | 0,000 | 0,000 | 0,000  | 0,000  | 0,000     | 0,000 | 0,000 |
| SS1                                 | 0,427 | 0,347 |       | 0,001 | 0,000        | 0,516 | 0,000 | 0,000 | 0,000  | 0,003  | 0,000     | 0,000 | 0,000 |
| SS2                                 | 0,203 | 0,696 | 0,451 |       | 0,870        | 0,000 | 0,735 | 0,388 | 0,652  | 0,068  | 0,165     | 0,000 | 0,113 |
| SS Upper mb.                        | 0,246 | 0,734 | 0,452 | 0,109 |              | 0,000 | 0,020 | 0,000 | 0,001  | 0,000  | 0,004     | 0,000 | 0,002 |
| MT                                  | 0,492 | 0,243 | 0,161 | 0,608 | 0,606        |       | 0,000 | 0,000 | 0,000  | 0,000  | 0,000     | 0,000 | 0,000 |
| MR                                  | 0,257 | 0,779 | 0,496 | 0,121 | 0,191        | 0,644 |       | 0,205 | 0,044  | 0,000  | 0,036     | 0,000 | 0,038 |
| BJ                                  | 0,158 | 0,795 | 0,459 | 0,149 | 0,231        | 0,606 | 0,105 |       | 0,182  | 0,000  | 0,000     | 0,000 | 0,000 |
| PQ-TRC                              | 0,169 | 0,719 | 0,458 | 0,121 | 0,211        | 0,616 | 0,135 | 0,082 |        | 0,000  | 0,000     | 0,000 | 0,000 |
| SI-REP                              | 0,145 | 0,573 | 0,313 | 0,213 | 0,281        | 0,471 | 0,312 | 0,235 | 0,180  |        | 0,000     | 0,000 | 0,000 |
| P-G-R-A-R                           | 0,306 | 0,856 | 0,599 | 0,178 | 0,178        | 0,757 | 0,125 | 0,162 | 0,141  | 0,289  |           | 0,000 | 0,000 |
| HT                                  | 0,491 | 0,848 | 0,633 | 0,454 | 0,352        | 0,721 | 0,499 | 0,496 | 0,507  | 0,581  | 0,478     |       | 0,000 |
| OMZ                                 | 0,309 | 0,862 | 0,597 | 0,194 | 0,196        | 0,755 | 0,131 | 0,151 | 0,182  | 0,350  | 0,167     | 0,479 |       |

D-values using error in the CDF

Figure S1: Results of the K-S (Kolmogorov-Smirnov) test applied to the U-Pb ages (90-110% concordance) of detrital zircon grains from the Toca da Moura (TM-3) and Cabrela (CB) volcano-sedimentary complexes, and the Santa Susana Formation (SS1, SS2, SS upper member), and different potential sources: OMZ (Linnemann et al. 2008; Pereira et al. 2008, 2012c), PLZ (Pereira et al. 2017; Pérez Cáceres et al. 2017), SPZ (Braid et al. 2011; Pereira et al., 2012a, 2014; Rodrigues et al. 2014). Abbreviations: MT- Mértola Formation; MR- Mira formation; BJ- Brejeira formation; PQ-TRC- Phyllite-Quartzite and Tercenas formations; SI-REP- Santa Iria and Represa formations; P-G-R-A-R- Pulo do Lobo, Gafo, Ribeira de Lima, Atalaia and Ronquillo formations; HT- Horta da Torre Formation.
