# Supplementary material for: Chronostratigraphic framework and provenance of the Ossa-Morena Zone Carboniferous basins (southwest Iberia)
Source: Copernicus journal article supplement (doi:10.5194/se-11-1291-2020), 2020-07-09
Supplement: Supplementary file 2 [file se-11-1291-2020-supplement.zip]

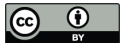

## *Supplement of*

# **Chronostratigraphic framework and provenance of the Ossa-Morena Zone Carboniferous basins (southwest Iberia)**

**Manuel Francisco Pereira et al.**

*Correspondence to:* Manuel Francisco Pereira ([mpereira@uevora.pt](mailto:mpereira@uevora.pt))

- [se-11-1291-2020-supplement-title-page.pdf](#)
- [supplementary files-se-2020-26\\_9-5-2020-revised version](#)
  - [Figure S1-suplem material- se-2020-26-revised version.pdf](#)
  - [Table S1-se-2020-26\\_9-5-2020-revised version.pdf](#)
  - [Table S2-se-2020-26\\_9-5-2020-revised version.pdf](#)

The copyright of individual parts of the supplement might differ from the CC BY 4.0 License.
