# Supplementary material for: Chronostratigraphic framework and provenance of the Ossa-Morena Zone Carboniferous basins (southwest Iberia)
Source: Copernicus journal article supplement (doi:10.5194/se-11-1291-2020), 2020-07-09
Supplement: Supplementary file 4 [file se-11-1291-2020-supplement.zip]

**Table S2- LA-ICPMS U-Pb zircon geochronology of samples SS-1 (38°29'41''N; 8°21'30''W), SS-2 (38°25'0.2''N; 8°19'30.8''W), TM-1 (38°28'30''N; 8°20'37''W), TM-3 (38°26'8''N; 8°18'24''W) and CBR-11(38°39'31.8''N; 8°22'16.3''W).**

a- within-run background-corrected mean  $^{207}\text{Pb}$  signal in counts per second

b- U and Pb content and Th/U ratio were calculated relative to GJ-1 and are accurate to approximately 10%.

c- corrected for background, mass bias, laser induced U-Pb fractionation and common Pb (if detectable, see analytical method) using Stacey & Kramers (1975) model Pb composition.  $^{207}\text{Pb}/^{235}\text{U}$  calculated using  $^{207}\text{Pb}/^{206}\text{Pb}/(^{238}\text{U}/^{206}\text{Pb} \times 1/137.88)$ . Errors are propagated by quadratic addition of within-run errors (2SE) and the reproducibility of GJ-1 (2SD).

d- Rho is the error correlation defined as  $\text{err}^{206}\text{Pb}/^{238}\text{U}/\text{err}^{207}\text{Pb}/^{235}\text{U}$ .

| Number | $^{207}\text{Pb}^{\text{a}}$<br>(cps) | U <sup>b</sup><br>(ppm) | Pb <sup>b</sup><br>(ppm) | Th <sup>b</sup><br>U | $^{206}\text{Pb}$<br>$^{204}\text{Pb}$ | $^{206}\text{Pb}^{\text{c}}$<br>$^{238}\text{U}$ | 2 s<br>% | $^{207}\text{Pb}^{\text{c}}$<br>$^{235}\text{U}$ | 2 s<br>% | $^{207}\text{Pb}^{\text{c}}$<br>$^{206}\text{Pb}$ | 2 s<br>% | rho <sup>d</sup> | $^{206}\text{Pb}$<br>$^{238}\text{U}$ | 2 s<br>(Ma) | $^{207}\text{Pb}$<br>$^{235}\text{U}$ | 2 s<br>(Ma) | $^{207}\text{Pb}$<br>$^{206}\text{Pb}$ | 2 s<br>(Ma) | conc<br>%  |
|--------|---------------------------------------|-------------------------|--------------------------|----------------------|----------------------------------------|--------------------------------------------------|----------|--------------------------------------------------|----------|---------------------------------------------------|----------|------------------|---------------------------------------|-------------|---------------------------------------|-------------|----------------------------------------|-------------|------------|
| SS-1   |                                       |                         |                          |                      |                                        |                                                  |          |                                                  |          |                                                   |          |                  |                                       |             |                                       |             |                                        |             |            |
| a1     | 11086                                 | 286                     | 18                       | 1,03                 | 1006                                   | 0,05275                                          | 2,7      | 0,47921                                          | 4,5      | 0,06589                                           | 3,7      | 0,58             | 331                                   | 9           | 398                                   | 15          | 803                                    | 77          | 41         |
| a2     | 1495                                  | 66                      | 4                        | 0,45                 | 2855                                   | 0,06118                                          | 3,2      | 0,45154                                          | 6,2      | 0,05353                                           | 5,2      | 0,53             | 383                                   | 12          | 378                                   | 20          | 351                                    | 118         | <b>109</b> |
| a3     | 2664                                  | 40                      | 5                        | 0,70                 | 4332                                   | 0,11112                                          | 2,4      | 0,96348                                          | 5,0      | 0,06289                                           | 4,3      | 0,48             | 679                                   | 15          | 685                                   | 25          | 704                                    | 92          | <b>96</b>  |
| a4     | 4712                                  | 67                      | 8                        | 0,64                 | 7486                                   | 0,10598                                          | 2,5      | 0,93351                                          | 4,0      | 0,06388                                           | 3,1      | 0,63             | 649                                   | 16          | 669                                   | 20          | 738                                    | 66          | 88         |
| a5     | 5076                                  | 186                     | 16                       | 0,96                 | 8596                                   | 0,08202                                          | 3,0      | 0,68135                                          | 7,1      | 0,06025                                           | 6,4      | 0,43             | 508                                   | 15          | 528                                   | 30          | 613                                    | 139         | 83         |
| a6     | 1186                                  | 42                      | 2                        | 0,54                 | 2323                                   | 0,05425                                          | 3,1      | 0,38849                                          | 7,7      | 0,05194                                           | 7,1      | 0,40             | 341                                   | 10          | 333                                   | 22          | 283                                    | 162         | 121        |
| a7     | 5817                                  | 229                     | 12                       | 0,60                 | 3683                                   | 0,04958                                          | 2,7      | 0,37186                                          | 5,2      | 0,05440                                           | 4,4      | 0,53             | 312                                   | 8           | 321                                   | 14          | 388                                    | 99          | 80         |
| a8     | 25915                                 | 197                     | 40                       | 0,29                 | 24618                                  | 0,19283                                          | 3,0      | 2,84664                                          | 3,4      | 0,10707                                           | 1,6      | 0,88             | 1137                                  | 31          | 1368                                  | 26          | 1750                                   | 30          | 65         |
| a9     | 10906                                 | 395                     | 20                       | 0,84                 | 8940                                   | 0,04491                                          | 2,6      | 0,35595                                          | 3,3      | 0,05748                                           | 2,1      | 0,79             | 283                                   | 7           | 309                                   | 9           | 510                                    | 45          | 56         |
| a10    | 60769                                 | 62                      | 44                       | 1,27                 | 33064                                  | 0,55999                                          | 2,2      | 14,41979                                         | 2,8      | 0,18676                                           | 1,6      | 0,81             | 2867                                  | 52          | 2778                                  | 26          | 2714                                   | 27          | <b>106</b> |
| a11    | 6092                                  | 91                      | 11                       | 0,79                 | 1959                                   | 0,11545                                          | 2,3      | 1,01680                                          | 3,2      | 0,06388                                           | 2,2      | 0,72             | 704                                   | 15          | 712                                   | 17          | 738                                    | 47          | <b>95</b>  |
| a12    | 16968                                 | 622                     | 36                       | 0,99                 | 5666                                   | 0,05158                                          | 2,3      | 0,38888                                          | 3,1      | 0,05468                                           | 2,1      | 0,73             | 324                                   | 7           | 334                                   | 9           | 399                                    | 47          | 81         |
| a13    | 6560                                  | 102                     | 14                       | 1,28                 | 3498                                   | 0,11077                                          | 2,3      | 0,94012                                          | 3,4      | 0,06156                                           | 2,4      | 0,70             | 677                                   | 15          | 673                                   | 17          | 659                                    | 52          | <b>103</b> |
| a14    | 19787                                 | 816                     | 49                       | 0,34                 | 1212                                   | 0,05648                                          | 2,1      | 0,51720                                          | 3,2      | 0,06641                                           | 2,4      | 0,67             | 354                                   | 7           | 423                                   | 11          | 819                                    | 50          | 43         |
| a15    | 5249                                  | 195                     | 10                       | 0,51                 | 9662                                   | 0,05025                                          | 2,4      | 0,38315                                          | 3,5      | 0,05530                                           | 2,6      | 0,68             | 316                                   | 7           | 329                                   | 10          | 424                                    | 58          | 74         |
| a16    | 3803                                  | 142                     | 7                        | 0,50                 | 7180                                   | 0,04975                                          | 2,5      | 0,37001                                          | 4,0      | 0,05395                                           | 3,1      | 0,62             | 313                                   | 8           | 320                                   | 11          | 369                                    | 71          | 85         |
| a17    | 1381                                  | 49                      | 3                        | 0,53                 | 768                                    | 0,05481                                          | 2,7      | 0,41265                                          | 5,5      | 0,05460                                           | 4,8      | 0,49             | 344                                   | 9           | 351                                   | 16          | 396                                    | 107         | 87         |
| a18    | 10333                                 | 372                     | 22                       | 0,68                 | 19663                                  | 0,05721                                          | 2,2      | 0,42141                                          | 3,1      | 0,05343                                           | 2,1      | 0,71             | 359                                   | 8           | 357                                   | 9           | 347                                    | 49          | <b>103</b> |
| a19    | 7233                                  | 278                     | 18                       | 0,97                 | 1120                                   | 0,05863                                          | 3,1      | 0,48477                                          | 5,3      | 0,05997                                           | 4,2      | 0,59             | 367                                   | 11          | 401                                   | 18          | 602                                    | 92          | 61         |
| a20    | 10026                                 | 382                     | 25                       | 1,32                 | 14532                                  | 0,05611                                          | 2,3      | 0,41424                                          | 3,0      | 0,05355                                           | 2,0      | 0,75             | 352                                   | 8           | 352                                   | 9           | 352                                    | 45          | <b>100</b> |
| a21    | 6019                                  | 233                     | 13                       | 0,55                 | 1845                                   | 0,05283                                          | 2,6      | 0,40645                                          | 4,3      | 0,05580                                           | 3,4      | 0,61             | 332                                   | 9           | 346                                   | 13          | 445                                    | 76          | 75         |

|     |        |      |     |      |       |         |     |         |     |         |     |      |      |    |      |    |      |     |            |
|-----|--------|------|-----|------|-------|---------|-----|---------|-----|---------|-----|------|------|----|------|----|------|-----|------------|
| a22 | 15704  | 504  | 31  | 1,17 | 1195  | 0,04881 | 2,4 | 0,41224 | 3,9 | 0,06126 | 3,0 | 0,63 | 307  | 7  | 350  | 12 | 648  | 65  | 47         |
| a23 | 2029   | 60   | 4   | 0,65 | 3741  | 0,05479 | 4,1 | 0,42054 | 5,3 | 0,05567 | 3,3 | 0,78 | 344  | 14 | 356  | 16 | 439  | 74  | 78         |
| a24 | 8407   | 310  | 19  | 0,67 | 16131 | 0,05745 | 2,8 | 0,42024 | 3,5 | 0,05305 | 2,1 | 0,80 | 360  | 10 | 356  | 11 | 331  | 48  | <b>109</b> |
| a25 | 138732 | 436  | 134 | 0,15 | 26636 | 0,30793 | 2,5 | 5,06749 | 2,6 | 0,11936 | 0,6 | 0,97 | 1731 | 39 | 1831 | 22 | 1947 | 11  | 89         |
| a26 | 5987   | 221  | 13  | 0,49 | 11297 | 0,05865 | 2,4 | 0,43592 | 3,3 | 0,05391 | 2,3 | 0,72 | 367  | 8  | 367  | 10 | 367  | 52  | <b>100</b> |
| a27 | 9506   | 516  | 28  | 1,03 | 1572  | 0,04572 | 2,2 | 0,40232 | 3,9 | 0,06382 | 3,2 | 0,58 | 288  | 6  | 343  | 11 | 736  | 67  | 39         |
| a28 | 10282  | 383  | 22  | 0,95 | 1787  | 0,05151 | 2,0 | 0,44247 | 6,8 | 0,06230 | 6,5 | 0,30 | 324  | 6  | 372  | 21 | 685  | 138 | 47         |
| a29 | 4974   | 203  | 11  | 0,58 | 9265  | 0,05280 | 2,5 | 0,39761 | 3,8 | 0,05462 | 2,8 | 0,67 | 332  | 8  | 340  | 11 | 397  | 63  | 84         |
| a30 | 8185   | 319  | 18  | 0,73 | 6069  | 0,05110 | 2,4 | 0,41098 | 3,5 | 0,05833 | 2,6 | 0,68 | 321  | 8  | 350  | 10 | 542  | 56  | 59         |
| a31 | 8977   | 281  | 28  | 0,99 | 7337  | 0,08720 | 2,8 | 0,72552 | 3,5 | 0,06034 | 2,2 | 0,78 | 539  | 14 | 554  | 15 | 616  | 47  | 88         |
| a32 | 3454   | 153  | 6   | 0,29 | 6357  | 0,03904 | 3,1 | 0,29729 | 5,5 | 0,05523 | 4,6 | 0,56 | 247  | 8  | 264  | 13 | 422  | 102 | 59         |
| a33 | 29188  | 142  | 39  | 0,76 | 17805 | 0,24786 | 2,4 | 3,26875 | 2,7 | 0,09565 | 1,2 | 0,89 | 1427 | 31 | 1474 | 21 | 1541 | 23  | <b>93</b>  |
| a34 | 6918   | 279  | 17  | 0,71 | 12840 | 0,05843 | 2,5 | 0,44165 | 3,0 | 0,05483 | 1,6 | 0,84 | 366  | 9  | 371  | 9  | 405  | 37  | <b>90</b>  |
| a35 | 104674 | 219  | 94  | 0,84 | 71789 | 0,35778 | 2,1 | 7,31321 | 2,3 | 0,14825 | 0,9 | 0,92 | 1972 | 36 | 2150 | 21 | 2326 | 16  | 85         |
| a36 | 23554  | 61   | 26  | 0,69 | 18543 | 0,38219 | 2,5 | 6,80907 | 2,8 | 0,12921 | 1,3 | 0,89 | 2086 | 45 | 2087 | 25 | 2087 | 23  | <b>100</b> |
| a37 | 3247   | 141  | 8   | 0,62 | 3042  | 0,05488 | 2,6 | 0,40665 | 5,3 | 0,05374 | 4,6 | 0,49 | 344  | 9  | 346  | 16 | 360  | 104 | <b>96</b>  |
| a38 | 561    | 24   | 1   | 0,26 | 1072  | 0,05497 | 2,7 | 0,40356 | 9,1 | 0,05325 | 8,7 | 0,30 | 345  | 9  | 344  | 27 | 339  | 197 | <b>102</b> |
| a39 | 19815  | 749  | 30  | 0,61 | 226   | 0,03136 | 6,3 | 0,50291 | 8,2 | 0,11632 | 5,1 | 0,78 | 199  | 12 | 414  | 28 | 1900 | 92  | 10         |
| a40 | 7128   | 230  | 10  | 1,13 | 303   | 0,03650 | 6,0 | 0,52300 | 7,6 | 0,10391 | 4,7 | 0,79 | 231  | 14 | 427  | 27 | 1695 | 86  | 14         |
| a41 | 11324  | 454  | 32  | 1,35 | 21498 | 0,06036 | 2,1 | 0,44571 | 2,7 | 0,05355 | 1,8 | 0,76 | 378  | 8  | 374  | 9  | 352  | 40  | <b>107</b> |
| a42 | 5447   | 140  | 13  | 0,57 | 8158  | 0,08768 | 2,4 | 0,71574 | 3,3 | 0,05920 | 2,3 | 0,72 | 542  | 12 | 548  | 14 | 575  | 49  | <b>94</b>  |
| a43 | 9837   | 436  | 26  | 0,70 | 14817 | 0,05629 | 2,5 | 0,41479 | 3,3 | 0,05344 | 2,1 | 0,77 | 353  | 9  | 352  | 10 | 348  | 48  | <b>102</b> |
| a44 | 7610   | 345  | 22  | 0,80 | 4822  | 0,05821 | 2,5 | 0,43354 | 3,7 | 0,05401 | 2,8 | 0,66 | 365  | 9  | 366  | 11 | 372  | 63  | <b>98</b>  |
| a45 | 2905   | 135  | 7   | 0,53 | 5430  | 0,05194 | 2,5 | 0,38973 | 4,3 | 0,05442 | 3,6 | 0,57 | 326  | 8  | 334  | 12 | 389  | 80  | 84         |
| a46 | 11055  | 567  | 32  | 1,02 | 21382 | 0,05066 | 2,8 | 0,36744 | 3,2 | 0,05260 | 1,6 | 0,87 | 319  | 9  | 318  | 9  | 312  | 36  | <b>102</b> |
| a47 | 2847   | 129  | 7   | 0,64 | 5465  | 0,05333 | 2,8 | 0,39007 | 4,5 | 0,05305 | 3,5 | 0,61 | 335  | 9  | 334  | 13 | 331  | 80  | <b>101</b> |
| a48 | 5171   | 235  | 15  | 0,78 | 1538  | 0,05814 | 2,4 | 0,44202 | 3,8 | 0,05514 | 2,9 | 0,64 | 364  | 9  | 372  | 12 | 418  | 65  | 87         |
| a49 | 5208   | 238  | 14  | 0,60 | 9785  | 0,05616 | 2,5 | 0,41912 | 3,8 | 0,05413 | 2,9 | 0,65 | 352  | 9  | 355  | 12 | 376  | 65  | <b>94</b>  |
| a50 | 4007   | 180  | 10  | 0,59 | 7185  | 0,05456 | 2,6 | 0,42682 | 4,0 | 0,05674 | 3,1 | 0,64 | 342  | 9  | 361  | 12 | 481  | 68  | 71         |
| a51 | 23193  | 904  | 53  | 0,98 | 912   | 0,05000 | 2,6 | 0,36050 | 6,8 | 0,05229 | 6,3 | 0,38 | 315  | 8  | 313  | 19 | 298  | 144 | <b>105</b> |
| a52 | 19458  | 813  | 41  | 0,89 | 1202  | 0,04271 | 2,3 | 0,39006 | 2,9 | 0,06623 | 1,7 | 0,80 | 270  | 6  | 334  | 8  | 814  | 36  | 33         |
| a53 | 25918  | 1259 | 53  | 0,36 | 474   | 0,03670 | 2,5 | 0,44675 | 4,3 | 0,08828 | 3,5 | 0,59 | 232  | 6  | 375  | 14 | 1389 | 67  | 17         |
| a54 | 9916   | 259  | 32  | 1,59 | 16866 | 0,09999 | 2,8 | 0,82622 | 3,5 | 0,05993 | 2,2 | 0,79 | 614  | 16 | 612  | 16 | 601  | 47  | <b>102</b> |

|     |       |     |    |      |       |         |     |         |      |         |      |      |      |    |      |    |      |     |            |
|-----|-------|-----|----|------|-------|---------|-----|---------|------|---------|------|------|------|----|------|----|------|-----|------------|
| a55 | 6144  | 301 | 19 | 0,63 | 11418 | 0,05982 | 2,4 | 0,45091 | 3,6  | 0,05467 | 2,7  | 0,67 | 375  | 9  | 378  | 12 | 399  | 61  | <b>94</b>  |
| a56 | 10009 | 492 | 29 | 0,57 | 4004  | 0,05707 | 2,3 | 0,42071 | 3,2  | 0,05347 | 2,2  | 0,72 | 358  | 8  | 357  | 10 | 349  | 51  | <b>103</b> |
| a57 | 11247 | 300 | 35 | 1,75 | 4466  | 0,09216 | 2,8 | 0,78253 | 5,3  | 0,06159 | 4,5  | 0,53 | 568  | 15 | 587  | 24 | 660  | 96  | 86         |
| a58 | 1540  | 75  | 4  | 0,32 | 1910  | 0,05283 | 2,9 | 0,43039 | 6,7  | 0,05909 | 6,0  | 0,44 | 332  | 9  | 363  | 21 | 570  | 131 | 58         |
| a59 | 6915  | 341 | 19 | 0,74 | 12698 | 0,05175 | 2,3 | 0,39236 | 3,3  | 0,05499 | 2,4  | 0,69 | 325  | 7  | 336  | 10 | 412  | 54  | 79         |
| a60 | 5739  | 280 | 17 | 0,48 | 10587 | 0,05888 | 2,3 | 0,44755 | 3,0  | 0,05513 | 1,9  | 0,76 | 369  | 8  | 376  | 9  | 418  | 43  | 88         |
| a61 | 4272  | 222 | 12 | 0,61 | 7997  | 0,05290 | 2,3 | 0,39477 | 4,0  | 0,05412 | 3,3  | 0,58 | 332  | 8  | 338  | 12 | 376  | 73  | 88         |
| a62 | 3173  | 252 | 14 | 0,67 | 1578  | 0,05402 | 2,7 | 0,43004 | 3,9  | 0,05774 | 2,8  | 0,69 | 339  | 9  | 363  | 12 | 520  | 63  | 65         |
| a63 | 12346 | 559 | 24 | 0,75 | 704   | 0,03529 | 2,4 | 0,35335 | 11,8 | 0,07263 | 11,5 | 0,21 | 224  | 5  | 307  | 32 | 1004 | 234 | 22         |
| a64 | 3480  | 192 | 11 | 0,74 | 6629  | 0,05482 | 2,5 | 0,40364 | 3,6  | 0,05340 | 2,6  | 0,69 | 344  | 8  | 344  | 10 | 346  | 58  | <b>99</b>  |
| a65 | 9923  | 471 | 18 | 0,95 | 800   | 0,03046 | 4,7 | 0,28613 | 6,9  | 0,06814 | 5,1  | 0,68 | 193  | 9  | 256  | 16 | 873  | 105 | 22         |
| a66 | 9670  | 538 | 33 | 0,85 | 3291  | 0,05658 | 2,1 | 0,42233 | 2,9  | 0,05414 | 1,9  | 0,75 | 355  | 7  | 358  | 9  | 377  | 43  | <b>94</b>  |
| a67 | 7354  | 189 | 13 | 0,61 | 240   | 0,05564 | 2,9 | 0,80781 | 8,3  | 0,10529 | 7,8  | 0,34 | 349  | 10 | 601  | 38 | 1719 | 144 | 20         |
| a68 | 7732  | 596 | 31 | 0,50 | 5675  | 0,04906 | 2,4 | 0,38981 | 4,0  | 0,05762 | 3,2  | 0,59 | 309  | 7  | 334  | 11 | 515  | 70  | 60         |
| a69 | 5836  | 342 | 18 | 0,83 | 11003 | 0,04888 | 2,5 | 0,36372 | 3,5  | 0,05397 | 2,5  | 0,71 | 308  | 7  | 315  | 10 | 370  | 56  | 83         |
| a70 | 9640  | 126 | 23 | 0,58 | 13356 | 0,17711 | 2,2 | 1,79312 | 2,9  | 0,07343 | 1,9  | 0,76 | 1051 | 22 | 1043 | 19 | 1026 | 38  | <b>102</b> |
| a71 | 7720  | 228 | 22 | 0,60 | 7744  | 0,09197 | 2,4 | 0,81270 | 4,5  | 0,06409 | 3,8  | 0,53 | 567  | 13 | 604  | 21 | 745  | 81  | 76         |
| a72 | 13055 | 674 | 48 | 0,91 | 1752  | 0,06503 | 2,2 | 0,55684 | 2,9  | 0,06211 | 1,9  | 0,75 | 406  | 9  | 449  | 11 | 678  | 41  | 60         |
| a73 | 8663  | 412 | 30 | 0,67 | 15729 | 0,06875 | 2,6 | 0,53081 | 3,3  | 0,05600 | 2,0  | 0,79 | 429  | 11 | 432  | 12 | 452  | 44  | <b>95</b>  |
| a74 | 8228  | 270 | 31 | 1,66 | 6436  | 0,09197 | 2,4 | 0,76984 | 3,4  | 0,06071 | 2,4  | 0,70 | 567  | 13 | 580  | 15 | 629  | 51  | <b>90</b>  |
| a75 | 4961  | 277 | 17 | 0,64 | 3151  | 0,05866 | 2,3 | 0,43453 | 3,4  | 0,05372 | 2,5  | 0,69 | 367  | 8  | 366  | 10 | 359  | 55  | <b>102</b> |
| a76 | 6015  | 371 | 21 | 0,55 | 6639  | 0,05532 | 2,2 | 0,41329 | 3,5  | 0,05418 | 2,7  | 0,63 | 347  | 8  | 351  | 10 | 379  | 61  | <b>92</b>  |
| a77 | 15308 | 922 | 61 | 1,03 | 28747 | 0,06009 | 2,4 | 0,44906 | 2,9  | 0,05420 | 1,7  | 0,82 | 376  | 9  | 377  | 9  | 379  | 37  | <b>99</b>  |
| a78 | 11276 | 720 | 41 | 0,69 | 10723 | 0,05392 | 2,5 | 0,39445 | 3,0  | 0,05306 | 1,7  | 0,83 | 339  | 8  | 338  | 9  | 331  | 37  | <b>102</b> |
| a79 | 9400  | 610 | 34 | 0,55 | 17746 | 0,05354 | 2,3 | 0,39759 | 3,2  | 0,05386 | 2,2  | 0,72 | 336  | 8  | 340  | 9  | 365  | 51  | <b>92</b>  |
| a80 | 3791  | 243 | 14 | 0,64 | 7180  | 0,05659 | 2,6 | 0,42138 | 4,0  | 0,05400 | 3,0  | 0,64 | 355  | 9  | 357  | 12 | 371  | 69  | <b>96</b>  |
| a81 | 2843  | 166 | 12 | 0,63 | 2986  | 0,06808 | 2,3 | 0,52028 | 4,3  | 0,05543 | 3,7  | 0,52 | 425  | 9  | 425  | 15 | 429  | 82  | <b>99</b>  |
| a82 | 2915  | 209 | 11 | 0,86 | 1591  | 0,05050 | 2,6 | 0,37658 | 4,6  | 0,05408 | 3,7  | 0,58 | 318  | 8  | 325  | 13 | 374  | 84  | 85         |
| a83 | 11770 | 793 | 48 | 0,78 | 22462 | 0,05604 | 2,4 | 0,41211 | 3,3  | 0,05334 | 2,4  | 0,71 | 351  | 8  | 350  | 10 | 343  | 53  | <b>102</b> |
| a84 | 1561  | 100 | 6  | 0,30 | 2754  | 0,05772 | 2,1 | 0,45785 | 6,0  | 0,05753 | 5,6  | 0,36 | 362  | 7  | 383  | 19 | 512  | 122 | 71         |
| a85 | 8457  | 537 | 37 | 0,57 | 3099  | 0,06669 | 2,0 | 0,48452 | 3,0  | 0,05269 | 2,2  | 0,68 | 416  | 8  | 401  | 10 | 316  | 49  | 132        |
| a86 | 2932  | 125 | 11 | 0,30 | 1945  | 0,08624 | 2,5 | 0,70314 | 4,6  | 0,05914 | 3,9  | 0,54 | 533  | 13 | 541  | 19 | 572  | 84  | <b>93</b>  |
| a87 | 12480 | 822 | 54 | 0,75 | 14272 | 0,06215 | 2,1 | 0,45970 | 2,8  | 0,05364 | 1,9  | 0,73 | 389  | 8  | 384  | 9  | 356  | 44  | <b>109</b> |

|      |       |      |     |      |       |         |      |         |      |         |      |      |     |    |     |    |     |     |            |
|------|-------|------|-----|------|-------|---------|------|---------|------|---------|------|------|-----|----|-----|----|-----|-----|------------|
| a88  | 5287  | 385  | 20  | 0,57 | 7427  | 0,05105 | 2,2  | 0,38159 | 3,4  | 0,05421 | 2,7  | 0,63 | 321 | 7  | 328 | 10 | 380 | 60  | 85         |
| a89  | 16721 | 1167 | 69  | 0,70 | 30653 | 0,05561 | 2,2  | 0,42540 | 3,1  | 0,05549 | 2,2  | 0,71 | 349 | 8  | 360 | 9  | 432 | 48  | 81         |
| a90  | 9203  | 696  | 38  | 0,57 | 17131 | 0,05255 | 2,6  | 0,39616 | 3,5  | 0,05467 | 2,4  | 0,73 | 330 | 8  | 339 | 10 | 399 | 54  | 83         |
| a91  | 7494  | 578  | 32  | 0,51 | 14338 | 0,05353 | 2,5  | 0,39258 | 3,8  | 0,05319 | 2,9  | 0,64 | 336 | 8  | 336 | 11 | 337 | 66  | <b>100</b> |
| a92  | 18578 | 1331 | 75  | 0,37 | 4915  | 0,05634 | 2,1  | 0,42395 | 2,9  | 0,05457 | 2,1  | 0,70 | 353 | 7  | 359 | 9  | 395 | 47  | 89         |
| a93  | 24659 | 845  | 100 | 1,06 | 27019 | 0,10340 | 2,3  | 0,88820 | 2,6  | 0,06230 | 1,2  | 0,88 | 634 | 14 | 645 | 12 | 684 | 26  | <b>93</b>  |
| a94  | 15710 | 1209 | 78  | 1,01 | 10812 | 0,05757 | 2,3  | 0,42273 | 2,6  | 0,05326 | 1,2  | 0,89 | 361 | 8  | 358 | 8  | 340 | 28  | <b>106</b> |
| a95  | 5744  | 383  | 27  | 0,41 | 10598 | 0,06969 | 2,1  | 0,52958 | 3,1  | 0,05512 | 2,3  | 0,66 | 434 | 9  | 432 | 11 | 417 | 52  | <b>104</b> |
| a96  | 6373  | 508  | 28  | 0,74 | 11409 | 0,05127 | 2,2  | 0,40201 | 3,9  | 0,05686 | 3,2  | 0,57 | 322 | 7  | 343 | 11 | 486 | 70  | 66         |
| a97  | 10796 | 841  | 45  | 0,29 | 3088  | 0,05514 | 2,0  | 0,42785 | 3,0  | 0,05628 | 2,2  | 0,68 | 346 | 7  | 362 | 9  | 463 | 48  | 75         |
| a98  | 372   | 37   | 3   | 0,31 | 646   | 0,07909 | 4,3  | 0,63027 | 14,0 | 0,05780 | 13,3 | 0,31 | 491 | 20 | 496 | 56 | 522 | 292 | <b>94</b>  |
| a99  | 7512  | 654  | 34  | 0,59 | 14031 | 0,04963 | 2,3  | 0,37271 | 3,0  | 0,05447 | 2,0  | 0,75 | 312 | 7  | 322 | 8  | 390 | 45  | 80         |
| a100 | 14541 | 1272 | 71  | 0,78 | 17330 | 0,05219 | 2,3  | 0,39677 | 3,1  | 0,05513 | 2,1  | 0,74 | 328 | 7  | 339 | 9  | 418 | 47  | 79         |
| a101 | 4440  | 394  | 20  | 0,54 | 8405  | 0,04844 | 2,4  | 0,35964 | 4,2  | 0,05384 | 3,5  | 0,58 | 305 | 7  | 312 | 11 | 364 | 78  | 84         |
| a102 | 4782  | 411  | 25  | 0,71 | 9133  | 0,05758 | 2,1  | 0,42331 | 3,1  | 0,05332 | 2,2  | 0,68 | 361 | 7  | 358 | 9  | 343 | 51  | <b>105</b> |
| a103 | 1205  | 106  | 5   | 0,33 | 2067  | 0,05122 | 2,7  | 0,41932 | 6,6  | 0,05937 | 6,0  | 0,42 | 322 | 9  | 356 | 20 | 581 | 130 | 55         |
| a104 | 8688  | 764  | 50  | 0,93 | 16253 | 0,05889 | 2,3  | 0,44109 | 3,4  | 0,05432 | 2,5  | 0,68 | 369 | 8  | 371 | 11 | 384 | 56  | <b>96</b>  |
| a105 | 2978  | 278  | 16  | 0,49 | 5732  | 0,05581 | 2,2  | 0,40665 | 4,6  | 0,05284 | 4,0  | 0,47 | 350 | 7  | 346 | 14 | 322 | 92  | <b>109</b> |
| a106 | 1634  | 159  | 9   | 0,57 | 1633  | 0,05486 | 2,2  | 0,39922 | 4,9  | 0,05278 | 4,4  | 0,45 | 344 | 7  | 341 | 14 | 319 | 100 | <b>108</b> |
| a107 | 14366 | 1200 | 73  | 0,72 | 1455  | 0,05701 | 2,3  | 0,40070 | 4,0  | 0,05097 | 3,3  | 0,58 | 357 | 8  | 342 | 12 | 240 | 76  | 149        |
| a108 | 3831  | 333  | 22  | 0,77 | 4014  | 0,06176 | 2,8  | 0,48069 | 4,2  | 0,05645 | 3,2  | 0,66 | 386 | 10 | 399 | 14 | 470 | 70  | 82         |
| a109 | 6790  | 584  | 36  | 0,56 | 12185 | 0,05973 | 2,8  | 0,45923 | 3,7  | 0,05576 | 2,5  | 0,75 | 374 | 10 | 384 | 12 | 443 | 55  | 84         |
| a110 | 7306  | 732  | 42  | 0,68 | 10576 | 0,05418 | 2,2  | 0,40597 | 3,2  | 0,05435 | 2,3  | 0,68 | 340 | 7  | 346 | 9  | 385 | 53  | 88         |
| a111 | 5682  | 607  | 36  | 0,76 | 10594 | 0,05484 | 2,1  | 0,41405 | 4,4  | 0,05476 | 3,9  | 0,48 | 344 | 7  | 352 | 13 | 403 | 87  | 85         |
| a112 | 11112 | 1261 | 74  | 1,10 | 2654  | 0,05143 | 2,5  | 0,38648 | 3,2  | 0,05450 | 2,0  | 0,79 | 323 | 8  | 332 | 9  | 392 | 44  | 83         |
| a113 | 8843  | 944  | 53  | 0,53 | 16712 | 0,05414 | 2,3  | 0,40164 | 3,1  | 0,05381 | 2,0  | 0,75 | 340 | 8  | 343 | 9  | 363 | 46  | <b>94</b>  |
| a114 | 12961 | 2129 | 18  | 0,65 | 735   | 0,00009 | 1336 | 0,00064 | 1336 | 0,05291 | 6,3  | 1,00 | 1   | 8  | 1   | 9  | 325 | 143 | 0          |
| a115 | 13321 | 2260 | 128 | 0,72 | 2627  | 0,05256 | 2,2  | 0,42674 | 3,2  | 0,05889 | 2,3  | 0,69 | 330 | 7  | 361 | 10 | 563 | 51  | 59         |
| a116 | 1428  | 217  | 14  | 0,42 | 812   | 0,06348 | 2,2  | 0,46968 | 6,7  | 0,05367 | 6,3  | 0,33 | 397 | 9  | 391 | 22 | 357 | 142 | 111        |
| a117 | 2060  | 246  | 13  | 0,74 | 4025  | 0,05001 | 2,8  | 0,35961 | 5,3  | 0,05216 | 4,5  | 0,52 | 315 | 8  | 312 | 14 | 292 | 104 | <b>108</b> |
| a118 | 4589  | 423  | 24  | 0,62 | 8565  | 0,05294 | 2,5  | 0,39781 | 3,8  | 0,05450 | 2,9  | 0,65 | 333 | 8  | 340 | 11 | 392 | 64  | 85         |

|      |       |      |     |      |       |         |     |         |     |         |     |      |      |    |      |    |      |     |            |
|------|-------|------|-----|------|-------|---------|-----|---------|-----|---------|-----|------|------|----|------|----|------|-----|------------|
| a119 | 5256  | 477  | 28  | 0,78 | 9734  | 0,05416 | 2,3 | 0,41017 | 3,5 | 0,05493 | 2,7 | 0,64 | 340  | 8  | 349  | 10 | 409  | 60  | 83         |
| a120 | 4183  | 387  | 22  | 0,58 | 8021  | 0,05459 | 2,3 | 0,39935 | 3,5 | 0,05305 | 2,6 | 0,67 | 343  | 8  | 341  | 10 | 331  | 59  | <b>103</b> |
| a121 | 5926  | 565  | 32  | 0,68 | 11233 | 0,05343 | 2,4 | 0,39525 | 3,5 | 0,05365 | 2,6 | 0,68 | 336  | 8  | 338  | 10 | 356  | 58  | <b>94</b>  |
| a122 | 11142 | 1038 | 63  | 0,70 | 21172 | 0,05772 | 2,3 | 0,42612 | 2,8 | 0,05355 | 1,5 | 0,85 | 362  | 8  | 360  | 8  | 352  | 33  | <b>103</b> |
| a123 | 1153  | 109  | 6   | 0,51 | 2091  | 0,05430 | 2,6 | 0,42037 | 6,5 | 0,05615 | 6,0 | 0,39 | 341  | 9  | 356  | 20 | 458  | 134 | 74         |
| a124 | 4038  | 400  | 24  | 0,76 | 3040  | 0,05489 | 2,2 | 0,40262 | 4,4 | 0,05320 | 3,8 | 0,50 | 344  | 7  | 344  | 13 | 337  | 85  | <b>102</b> |
| a125 | 7243  | 689  | 39  | 0,41 | 13360 | 0,05726 | 2,8 | 0,42650 | 3,7 | 0,05403 | 2,4 | 0,75 | 359  | 10 | 361  | 11 | 372  | 55  | <b>96</b>  |
| a126 | 2604  | 286  | 17  | 0,77 | 4983  | 0,05332 | 2,4 | 0,39116 | 4,4 | 0,05321 | 3,7 | 0,55 | 335  | 8  | 335  | 13 | 338  | 83  | <b>99</b>  |
| a127 | 10133 | 1129 | 70  | 1,20 | 5843  | 0,05421 | 2,6 | 0,40391 | 3,6 | 0,05404 | 2,4 | 0,73 | 340  | 9  | 344  | 10 | 373  | 55  | <b>91</b>  |
| a128 | 2264  | 248  | 14  | 0,60 | 4311  | 0,05560 | 2,4 | 0,40927 | 4,6 | 0,05338 | 3,9 | 0,53 | 349  | 8  | 348  | 14 | 345  | 89  | <b>101</b> |
| a129 | 42075 | 473  | 205 | 2,89 | 42898 | 0,28581 | 2,0 | 3,93077 | 2,3 | 0,09975 | 1,0 | 0,89 | 1621 | 29 | 1620 | 19 | 1619 | 19  | <b>100</b> |
| a130 | 7034  | 818  | 47  | 0,85 | 13419 | 0,05194 | 2,4 | 0,38186 | 3,9 | 0,05332 | 3,1 | 0,61 | 326  | 8  | 328  | 11 | 343  | 69  | <b>95</b>  |
| a131 | 7242  | 841  | 50  | 0,73 | 14117 | 0,05616 | 2,1 | 0,40341 | 2,9 | 0,05210 | 2,0 | 0,73 | 352  | 7  | 344  | 8  | 290  | 45  | 122        |
| a132 | 7683  | 880  | 51  | 0,57 | 14685 | 0,05617 | 2,1 | 0,41183 | 3,5 | 0,05317 | 2,8 | 0,60 | 352  | 7  | 350  | 10 | 336  | 64  | <b>105</b> |
| a133 | 6031  | 717  | 42  | 0,60 | 2967  | 0,05591 | 2,3 | 0,41950 | 3,5 | 0,05442 | 2,6 | 0,65 | 351  | 8  | 356  | 10 | 388  | 59  | <b>90</b>  |
| a134 | 13044 | 1584 | 95  | 0,98 | 24618 | 0,05395 | 2,4 | 0,40095 | 2,9 | 0,05390 | 1,8 | 0,80 | 339  | 8  | 342  | 9  | 367  | 40  | <b>92</b>  |
| a135 | 7208  | 901  | 52  | 0,86 | 6180  | 0,05222 | 2,7 | 0,38383 | 3,6 | 0,05331 | 2,4 | 0,74 | 328  | 8  | 330  | 10 | 342  | 54  | <b>96</b>  |
| a136 | 5651  | 727  | 56  | 1,07 | 10750 | 0,06971 | 2,4 | 0,51417 | 4,1 | 0,05349 | 3,3 | 0,58 | 434  | 10 | 421  | 14 | 350  | 76  | 124        |
| a137 | 22522 | 2596 | 102 | 0,56 | 452   | 0,03439 | 2,3 | 0,41794 | 3,3 | 0,08814 | 2,4 | 0,69 | 218  | 5  | 355  | 10 | 1386 | 47  | 16         |
| a138 | 7498  | 903  | 47  | 0,70 | 2083  | 0,04794 | 2,5 | 0,41087 | 3,8 | 0,06216 | 2,8 | 0,66 | 302  | 7  | 350  | 11 | 680  | 60  | 44         |
| a139 | 2200  | 315  | 16  | 0,45 | 4069  | 0,05110 | 2,9 | 0,38767 | 4,6 | 0,05502 | 3,6 | 0,63 | 321  | 9  | 333  | 13 | 413  | 80  | 78         |
| a140 | 7482  | 1054 | 64  | 0,82 | 5908  | 0,05608 | 2,6 | 0,41710 | 3,6 | 0,05395 | 2,4 | 0,73 | 352  | 9  | 354  | 11 | 369  | 55  | <b>95</b>  |
| a141 | 12002 | 2022 | 103 | 0,61 | 22842 | 0,04889 | 2,8 | 0,36008 | 3,9 | 0,05342 | 2,7 | 0,73 | 308  | 9  | 312  | 11 | 347  | 60  | 89         |
| a142 | 1307  | 161  | 18  | 1,54 | 840   | 0,08644 | 3,2 | 0,67144 | 8,9 | 0,05633 | 8,3 | 0,36 | 534  | 16 | 522  | 37 | 466  | 184 | 115        |
| a143 | 23129 | 5467 | 148 | 0,09 | 997   | 0,02177 | 2,4 | 0,21235 | 2,7 | 0,07075 | 1,2 | 0,90 | 139  | 3  | 196  | 5  | 950  | 24  | 15         |
| a144 | 83126 | 9819 | 315 | 0,05 | 101   | 0,02202 | 3,0 | 0,59622 | 3,7 | 0,19640 | 2,2 | 0,80 | 140  | 4  | 475  | 14 | 2796 | 36  | 5          |
| a145 | 5976  | 861  | 55  | 0,83 | 2829  | 0,05876 | 2,2 | 0,43573 | 3,5 | 0,05378 | 2,7 | 0,64 | 368  | 8  | 367  | 11 | 362  | 61  | <b>102</b> |
| a146 | 4936  | 819  | 50  | 0,70 | 9247  | 0,05728 | 2,1 | 0,42926 | 3,8 | 0,05436 | 3,1 | 0,57 | 359  | 7  | 363  | 12 | 386  | 70  | <b>93</b>  |
| a147 | 6730  | 1242 | 69  | 0,56 | 12871 | 0,05416 | 2,7 | 0,39711 | 3,6 | 0,05317 | 2,5 | 0,73 | 340  | 9  | 340  | 11 | 336  | 56  | <b>101</b> |
| a148 | 17442 | 222  | 93  | 1,11 | 14878 | 0,35116 | 2,3 | 5,77289 | 2,8 | 0,11923 | 1,6 | 0,81 | 1940 | 38 | 1942 | 24 | 1945 | 29  | <b>100</b> |
| a149 | 4920  | 411  | 57  | 2,19 | 7725  | 0,10149 | 2,1 | 0,91557 | 4,1 | 0,06543 | 3,6 | 0,50 | 623  | 12 | 660  | 20 | 788  | 75  | 79         |
| a150 | 1198  | 244  | 14  | 0,84 | 2264  | 0,05336 | 3,2 | 0,39282 | 6,9 | 0,05339 | 6,1 | 0,46 | 335  | 10 | 336  | 20 | 346  | 139 | <b>97</b>  |

|      |        |     |    |      |       |         |     |         |      |         |      |      |      |    |      |    |      |     |            |
|------|--------|-----|----|------|-------|---------|-----|---------|------|---------|------|------|------|----|------|----|------|-----|------------|
| SS-2 |        |     |    |      |       |         |     |         |      |         |      |      |      |    |      |    |      |     |            |
| a1   | 49691  | 50  | 23 | 0,97 | 38489 | 0,39479 | 1,5 | 7,16381 | 1,8  | 0,13161 | 1,0  | 0,82 | 2145 | 27 | 2132 | 16 | 2120 | 18  | <b>101</b> |
| a2   | 28080  | 450 | 28 | 0,24 | 6917  | 0,06602 | 1,1 | 0,49048 | 1,8  | 0,05388 | 1,5  | 0,62 | 412  | 5  | 405  | 6  | 366  | 33  | 113        |
| a3   | 12921  | 196 | 13 | 0,67 | 1496  | 0,06013 | 2,7 | 0,43730 | 6,2  | 0,05274 | 5,6  | 0,43 | 376  | 10 | 368  | 19 | 318  | 128 | 118        |
| a4   | 14756  | 275 | 12 | 0,49 | 2397  | 0,04127 | 2,0 | 0,33855 | 3,0  | 0,05950 | 2,2  | 0,67 | 261  | 5  | 296  | 8  | 585  | 49  | 45         |
| a5   | 75413  | 78  | 32 | 0,44 | 59331 | 0,38108 | 1,6 | 6,80727 | 1,8  | 0,12956 | 0,9  | 0,88 | 2081 | 29 | 2087 | 16 | 2092 | 15  | <b>99</b>  |
| a6   | 21446  | 182 | 21 | 0,88 | 36019 | 0,10293 | 1,5 | 0,86134 | 2,0  | 0,06069 | 1,4  | 0,74 | 632  | 9  | 631  | 10 | 628  | 30  | <b>101</b> |
| a7   | 11341  | 205 | 12 | 0,58 | 21522 | 0,05403 | 1,5 | 0,40068 | 2,7  | 0,05378 | 2,3  | 0,54 | 339  | 5  | 342  | 8  | 362  | 51  | <b>94</b>  |
| a8   | 11068  | 197 | 12 | 0,87 | 20765 | 0,05331 | 1,7 | 0,39927 | 3,4  | 0,05431 | 2,9  | 0,51 | 335  | 6  | 341  | 10 | 384  | 65  | 87         |
| a9   | 7940   | 139 | 8  | 0,49 | 6350  | 0,05781 | 1,2 | 0,43324 | 2,2  | 0,05435 | 1,9  | 0,55 | 362  | 4  | 365  | 7  | 386  | 42  | <b>94</b>  |
| a10  | 15471  | 283 | 16 | 0,67 | 8894  | 0,05292 | 1,5 | 0,39318 | 2,1  | 0,05389 | 1,5  | 0,70 | 332  | 5  | 337  | 6  | 366  | 34  | <b>91</b>  |
| a11  | 13485  | 248 | 14 | 0,67 | 25218 | 0,05288 | 1,5 | 0,39751 | 2,3  | 0,05452 | 1,8  | 0,63 | 332  | 5  | 340  | 7  | 393  | 40  | 85         |
| a12  | 5169   | 42  | 6  | 2,29 | 3928  | 0,10323 | 1,5 | 0,87876 | 3,5  | 0,06174 | 3,2  | 0,43 | 633  | 9  | 640  | 17 | 665  | 68  | <b>95</b>  |
| a13  | 7142   | 133 | 7  | 0,62 | 13511 | 0,05251 | 1,4 | 0,39056 | 2,6  | 0,05395 | 2,1  | 0,55 | 330  | 4  | 335  | 7  | 369  | 48  | 89         |
| a14  | 11926  | 222 | 12 | 0,58 | 4039  | 0,05061 | 1,4 | 0,38569 | 2,7  | 0,05527 | 2,3  | 0,53 | 318  | 4  | 331  | 8  | 423  | 51  | 75         |
| a15  | 14180  | 271 | 16 | 0,97 | 7750  | 0,05079 | 1,8 | 0,37834 | 2,5  | 0,05403 | 1,8  | 0,72 | 319  | 6  | 326  | 7  | 372  | 40  | 86         |
| a16  | 18338  | 332 | 15 | 0,33 | 4379  | 0,04355 | 2,8 | 0,35697 | 3,9  | 0,05945 | 2,7  | 0,72 | 275  | 8  | 310  | 10 | 584  | 59  | 47         |
| a17  | 8606   | 145 | 8  | 0,40 | 15771 | 0,05559 | 1,4 | 0,42611 | 2,6  | 0,05560 | 2,2  | 0,55 | 349  | 5  | 360  | 8  | 436  | 49  | 80         |
| a18  | 1199   | 23  | 1  | 0,37 | 439   | 0,05058 | 2,2 | 0,38132 | 6,0  | 0,05467 | 5,5  | 0,37 | 318  | 7  | 328  | 17 | 399  | 124 | 80         |
| a19  | 3147   | 61  | 3  | 0,31 | 1083  | 0,05095 | 1,8 | 0,38194 | 3,5  | 0,05437 | 3,0  | 0,51 | 320  | 6  | 328  | 10 | 386  | 68  | 83         |
| a20  | 1978   | 39  | 2  | 0,39 | 3768  | 0,05075 | 1,8 | 0,37445 | 4,4  | 0,05351 | 4,0  | 0,41 | 319  | 6  | 323  | 12 | 350  | 90  | <b>91</b>  |
| a21  | 155463 | 198 | 79 | 0,59 | 46706 | 0,36993 | 1,2 | 6,09414 | 1,4  | 0,11948 | 0,7  | 0,86 | 2029 | 20 | 1989 | 12 | 1948 | 12  | <b>104</b> |
| a22  | 7900   | 157 | 8  | 0,59 | 14928 | 0,05150 | 1,4 | 0,37954 | 2,5  | 0,05345 | 2,1  | 0,55 | 324  | 4  | 327  | 7  | 348  | 48  | <b>93</b>  |
| a23  | 4489   | 78  | 5  | 0,73 | 8215  | 0,05684 | 1,6 | 0,43706 | 3,4  | 0,05576 | 3,0  | 0,46 | 356  | 5  | 368  | 11 | 443  | 68  | 80         |
| a24  | 10747  | 195 | 12 | 0,53 | 8714  | 0,05704 | 1,8 | 0,42347 | 2,6  | 0,05385 | 1,8  | 0,69 | 358  | 6  | 359  | 8  | 365  | 42  | <b>98</b>  |
| a25  | 23237  | 114 | 14 | 0,56 | 29214 | 0,10781 | 2,7 | 1,20811 | 3,4  | 0,08127 | 2,1  | 0,79 | 660  | 17 | 804  | 19 | 1228 | 41  | 54         |
| a26  | 78161  | 87  | 36 | 0,44 | 32758 | 0,38954 | 1,9 | 7,04592 | 2,2  | 0,13118 | 1,0  | 0,88 | 2121 | 34 | 2117 | 19 | 2114 | 18  | <b>100</b> |
| a27  | 1657   | 31  | 2  | 0,42 | 1344  | 0,05411 | 1,8 | 0,42296 | 6,1  | 0,05669 | 5,9  | 0,29 | 340  | 6  | 358  | 19 | 479  | 129 | 71         |
| a28  | 9976   | 219 | 11 | 0,55 | 13433 | 0,04807 | 1,4 | 0,35898 | 2,5  | 0,05416 | 2,1  | 0,55 | 303  | 4  | 311  | 7  | 378  | 46  | 80         |
| a29  | 8297   | 170 | 9  | 0,54 | 4532  | 0,05256 | 1,3 | 0,39208 | 2,6  | 0,05410 | 2,2  | 0,52 | 330  | 4  | 336  | 7  | 375  | 50  | 88         |
| a30  | 15743  | 385 | 10 | 0,50 | 2599  | 0,02301 | 2,1 | 0,18607 | 3,3  | 0,05864 | 2,5  | 0,64 | 147  | 3  | 173  | 5  | 554  | 55  | 26         |
| a31  | 8457   | 68  | 6  | 0,45 | 277   | 0,06785 | 2,2 | 1,10027 | 11,5 | 0,11761 | 11,3 | 0,19 | 423  | 9  | 753  | 63 | 1920 | 203 | 22         |

|     |        |     |     |      |       |         |     |         |     |         |     |      |      |    |      |    |      |     |            |
|-----|--------|-----|-----|------|-------|---------|-----|---------|-----|---------|-----|------|------|----|------|----|------|-----|------------|
| a32 | 8345   | 152 | 10  | 0,83 | 15357 | 0,05863 | 1,6 | 0,44759 | 2,9 | 0,05537 | 2,4 | 0,57 | 367  | 6  | 376  | 9  | 427  | 52  | 86         |
| a33 | 9155   | 66  | 9   | 0,81 | 14099 | 0,12639 | 1,5 | 1,15290 | 2,7 | 0,06615 | 2,2 | 0,56 | 767  | 11 | 779  | 15 | 811  | 46  | <b>95</b>  |
| a34 | 6745   | 132 | 7   | 0,39 | 12167 | 0,05099 | 1,9 | 0,39698 | 3,1 | 0,05646 | 2,4 | 0,61 | 321  | 6  | 339  | 9  | 471  | 54  | 68         |
| a35 | 51390  | 514 | 49  | 0,18 | 13948 | 0,09899 | 1,6 | 0,82321 | 1,9 | 0,06031 | 0,9 | 0,86 | 608  | 9  | 610  | 9  | 615  | 20  | <b>99</b>  |
| a36 | 9708   | 162 | 9   | 0,51 | 1006  | 0,05467 | 1,2 | 0,50965 | 5,8 | 0,06761 | 5,7 | 0,21 | 343  | 4  | 418  | 20 | 857  | 117 | 40         |
| a37 | 21849  | 245 | 19  | 0,02 | 2479  | 0,08247 | 1,3 | 0,75246 | 2,1 | 0,06617 | 1,6 | 0,64 | 511  | 7  | 570  | 9  | 812  | 34  | 63         |
| a38 | 36153  | 540 | 24  | 0,03 | 2554  | 0,04626 | 2,1 | 0,41820 | 2,5 | 0,06557 | 1,4 | 0,84 | 292  | 6  | 355  | 8  | 793  | 29  | 37         |
| a39 | 16227  | 276 | 20  | 0,77 | 3496  | 0,06839 | 1,5 | 0,50422 | 3,8 | 0,05347 | 3,5 | 0,41 | 426  | 6  | 415  | 13 | 349  | 78  | 122        |
| a40 | 2094   | 43  | 2   | 0,35 | 1577  | 0,05532 | 1,5 | 0,40772 | 5,8 | 0,05345 | 5,6 | 0,26 | 347  | 5  | 347  | 17 | 348  | 128 | <b>100</b> |
| a41 | 12825  | 234 | 12  | 0,45 | 23299 | 0,04878 | 1,9 | 0,37694 | 2,9 | 0,05604 | 2,2 | 0,66 | 307  | 6  | 325  | 8  | 454  | 49  | 68         |
| a42 | 8337   | 80  | 11  | 1,46 | 4073  | 0,10962 | 1,8 | 0,97927 | 3,0 | 0,06479 | 2,4 | 0,60 | 671  | 12 | 693  | 15 | 768  | 51  | 87         |
| a43 | 8618   | 15  | 6   | 1,05 | 6800  | 0,32167 | 1,7 | 4,91844 | 2,6 | 0,11090 | 2,0 | 0,66 | 1798 | 27 | 1805 | 22 | 1814 | 36  | <b>99</b>  |
| a44 | 1444   | 17  | 2   | 2,16 | 2545  | 0,08925 | 1,7 | 0,71266 | 6,6 | 0,05791 | 6,3 | 0,26 | 551  | 9  | 546  | 28 | 527  | 139 | <b>105</b> |
| a45 | 29843  | 361 | 24  | 0,89 | 348   | 0,05427 | 1,4 | 0,72029 | 5,0 | 0,09627 | 4,9 | 0,27 | 341  | 5  | 551  | 22 | 1553 | 91  | 22         |
| a46 | 5191   | 40  | 3   | 0,62 | 159   | 0,05928 | 2,8 | 1,29236 | 5,4 | 0,15812 | 4,6 | 0,53 | 371  | 10 | 842  | 31 | 2436 | 77  | 15         |
| a47 | 12705  | 414 | 17  | 0,28 | 906   | 0,04186 | 1,7 | 0,33807 | 3,1 | 0,05857 | 2,6 | 0,53 | 264  | 4  | 296  | 8  | 551  | 58  | 48         |
| a48 | 6505   | 141 | 8   | 0,58 | 4148  | 0,05082 | 1,4 | 0,37761 | 2,8 | 0,05389 | 2,3 | 0,52 | 320  | 4  | 325  | 8  | 366  | 53  | 87         |
| a49 | 23265  | 523 | 33  | 0,09 | 5207  | 0,05714 | 2,2 | 0,42559 | 3,0 | 0,05402 | 2,0 | 0,73 | 358  | 8  | 360  | 9  | 372  | 45  | <b>96</b>  |
| a50 | 8696   | 393 | 5   | 0,18 | 205   | 0,00696 | 6,8 | 0,09994 | 8,0 | 0,10407 | 4,3 | 0,84 | 45   | 3  | 97   | 7  | 1698 | 80  | 3          |
| b1  | 12927  | 584 | 32  | 0,69 | 2729  | 0,05178 | 2,9 | 0,40482 | 4,8 | 0,05670 | 3,8 | 0,61 | 325  | 9  | 345  | 14 | 480  | 84  | 68         |
| b2  | 6652   | 91  | 8   | 1,59 | 278   | 0,06186 | 1,7 | 0,96125 | 4,2 | 0,11270 | 3,9 | 0,40 | 387  | 6  | 684  | 21 | 1843 | 70  | 21         |
| b3  | 24722  | 356 | 39  | 0,44 | 15084 | 0,10705 | 1,6 | 0,98995 | 3,5 | 0,06707 | 3,1 | 0,46 | 656  | 10 | 699  | 18 | 840  | 64  | 78         |
| b4  | 3777   | 130 | 7   | 0,49 | 3238  | 0,05440 | 2,1 | 0,38901 | 3,3 | 0,05186 | 2,5 | 0,64 | 341  | 7  | 334  | 9  | 279  | 58  | 122        |
| b5  | 9912   | 365 | 18  | 0,50 | 3440  | 0,04743 | 1,4 | 0,38012 | 3,0 | 0,05812 | 2,6 | 0,49 | 299  | 4  | 327  | 8  | 534  | 56  | 56         |
| b6  | 14028  | 510 | 26  | 0,61 | 3802  | 0,04794 | 1,7 | 0,36631 | 2,7 | 0,05542 | 2,2 | 0,61 | 302  | 5  | 317  | 7  | 429  | 48  | 70         |
| b7  | 7135   | 267 | 10  | 0,65 | 13137 | 0,02992 | 6,3 | 0,22804 | 7,1 | 0,05528 | 3,1 | 0,90 | 190  | 12 | 209  | 13 | 424  | 69  | 45         |
| b8  | 7081   | 114 | 13  | 0,98 | 2432  | 0,09876 | 1,5 | 0,86051 | 2,7 | 0,06319 | 2,2 | 0,57 | 607  | 9  | 630  | 13 | 715  | 47  | 85         |
| b9  | 7960   | 260 | 15  | 0,40 | 2573  | 0,05768 | 3,1 | 0,48663 | 4,7 | 0,06119 | 3,5 | 0,66 | 362  | 11 | 403  | 16 | 646  | 76  | 56         |
| b10 | 45136  | 155 | 57  | 1,66 | 40069 | 0,27773 | 1,5 | 4,38396 | 1,8 | 0,11448 | 1,1 | 0,80 | 1580 | 21 | 1709 | 15 | 1872 | 20  | 84         |
| b11 | 9477   | 351 | 14  | 0,32 | 472   | 0,03677 | 3,5 | 0,39244 | 5,2 | 0,07741 | 3,8 | 0,67 | 233  | 8  | 336  | 15 | 1132 | 76  | 21         |
| b12 | 81863  | 630 | 59  | 0,46 | 3797  | 0,08153 | 4,0 | 1,43143 | 4,2 | 0,12734 | 1,3 | 0,95 | 505  | 19 | 902  | 25 | 2062 | 23  | 25         |
| b13 | 7479   | 265 | 14  | 0,50 | 10346 | 0,05050 | 1,6 | 0,38793 | 2,7 | 0,05572 | 2,2 | 0,60 | 318  | 5  | 333  | 8  | 441  | 48  | 72         |
| b14 | 118008 | 612 | 119 | 0,34 | 3126  | 0,18470 | 3,1 | 2,75163 | 3,3 | 0,10805 | 1,2 | 0,94 | 1093 | 31 | 1343 | 25 | 1767 | 21  | 62         |

|     |        |     |     |      |       |         |      |          |      |         |      |      |      |    |      |    |      |     |            |
|-----|--------|-----|-----|------|-------|---------|------|----------|------|---------|------|------|------|----|------|----|------|-----|------------|
| b15 | 15571  | 569 | 29  | 0,51 | 1239  | 0,04808 | 1,5  | 0,34987  | 6,4  | 0,05277 | 6,3  | 0,23 | 303  | 4  | 305  | 17 | 319  | 142 | <b>95</b>  |
| b16 | 9292   | 361 | 21  | 1,33 | 3231  | 0,03937 | 4,5  | 0,35870  | 7,4  | 0,06608 | 5,8  | 0,62 | 249  | 11 | 311  | 20 | 809  | 122 | 31         |
| b17 | 9817   | 359 | 22  | 1,15 | 9240  | 0,03038 | 5,1  | 0,27502  | 5,8  | 0,06566 | 2,8  | 0,88 | 193  | 10 | 247  | 13 | 795  | 58  | 24         |
| b18 | 6720   | 344 | 10  | 0,41 | 904   | 0,02640 | 1,8  | 0,28769  | 10,9 | 0,07904 | 10,7 | 0,17 | 168  | 3  | 257  | 25 | 1173 | 212 | 14         |
| b19 | 7542   | 278 | 16  | 0,64 | 1467  | 0,05230 | 1,6  | 0,42643  | 6,1  | 0,05914 | 5,9  | 0,26 | 329  | 5  | 361  | 19 | 572  | 128 | 57         |
| b20 | 105750 | 698 | 91  | 0,08 | 4317  | 0,12900 | 2,7  | 2,20121  | 3,0  | 0,12376 | 1,2  | 0,91 | 782  | 20 | 1181 | 21 | 2011 | 22  | 39         |
| b21 | 9816   | 326 | 21  | 0,51 | 1500  | 0,06101 | 1,3  | 0,55681  | 3,7  | 0,06620 | 3,5  | 0,36 | 382  | 5  | 449  | 14 | 813  | 73  | 47         |
| b22 | 188823 | 267 | 133 | 0,56 | 36453 | 0,42155 | 2,0  | 11,85644 | 2,1  | 0,20399 | 0,7  | 0,94 | 2267 | 38 | 2593 | 20 | 2858 | 12  | 79         |
| b23 | 11420  | 221 | 23  | 0,68 | 12321 | 0,09774 | 1,9  | 0,83447  | 2,6  | 0,06192 | 1,8  | 0,72 | 601  | 11 | 616  | 12 | 671  | 38  | 90         |
| b24 | 8678   | 102 | 10  | 0,72 | 181   | 0,07063 | 2,5  | 1,45320  | 8,1  | 0,14923 | 7,7  | 0,31 | 440  | 11 | 911  | 50 | 2337 | 131 | 19         |
| b25 | 14850  | 264 | 31  | 0,68 | 2023  | 0,10922 | 1,2  | 1,01604  | 2,5  | 0,06747 | 2,2  | 0,49 | 668  | 8  | 712  | 13 | 852  | 45  | 78         |
| b26 | 17580  | 573 | 42  | 0,02 | 7377  | 0,07893 | 2,7  | 0,69918  | 3,6  | 0,06425 | 2,4  | 0,74 | 490  | 13 | 538  | 15 | 750  | 51  | 65         |
| b27 | 22360  | 315 | 40  | 0,14 | 24436 | 0,13170 | 2,7  | 1,19050  | 3,1  | 0,06556 | 1,7  | 0,84 | 798  | 20 | 796  | 18 | 792  | 36  | <b>101</b> |
| b28 | 12037  | 30  | 19  | 3,57 | 9555  | 0,36441 | 1,4  | 6,43776  | 2,4  | 0,12813 | 2,0  | 0,58 | 2003 | 24 | 2037 | 22 | 2072 | 35  | <b>97</b>  |
| b29 | 16362  | 334 | 37  | 1,08 | 26716 | 0,09317 | 2,1  | 0,80179  | 2,7  | 0,06242 | 1,7  | 0,78 | 574  | 11 | 598  | 12 | 688  | 35  | 83         |
| b30 | 14286  | 209 | 30  | 0,92 | 3129  | 0,12762 | 1,5  | 1,15116  | 3,1  | 0,06542 | 2,7  | 0,50 | 774  | 11 | 778  | 17 | 788  | 56  | <b>98</b>  |
| b31 | 12224  | 440 | 27  | 0,45 | 15724 | 0,05936 | 1,2  | 0,45111  | 2,5  | 0,05512 | 2,2  | 0,49 | 372  | 4  | 378  | 8  | 417  | 49  | 89         |
| b32 | 77012  | 172 | 82  | 0,99 | 28342 | 0,39966 | 1,6  | 7,74389  | 2,0  | 0,14053 | 1,2  | 0,79 | 2167 | 29 | 2202 | 18 | 2234 | 21  | <b>97</b>  |
| b33 | 16568  | 298 | 22  | 0,35 | 125   | 0,05421 | 2,4  | 1,33210  | 14,9 | 0,17820 | 14,7 | 0,16 | 340  | 8  | 860  | 90 | 2636 | 244 | 13         |
| b34 | 2352   | 23  | 5   | 1,28 | 2927  | 0,15984 | 2,7  | 1,80292  | 5,1  | 0,08180 | 4,3  | 0,53 | 956  | 24 | 1047 | 34 | 1241 | 85  | 77         |
| b35 | 6376   | 122 | 13  | 0,81 | 5489  | 0,09224 | 1,6  | 0,81727  | 5,2  | 0,06426 | 5,0  | 0,30 | 569  | 9  | 607  | 24 | 750  | 105 | 76         |
| b36 | 1487   | 58  | 4   | 0,51 | 1078  | 0,05976 | 1,9  | 0,45080  | 5,6  | 0,05471 | 5,2  | 0,34 | 374  | 7  | 378  | 18 | 401  | 117 | <b>93</b>  |
| b37 | 4748   | 99  | 12  | 0,92 | 626   | 0,10556 | 1,6  | 1,03139  | 4,3  | 0,07087 | 4,0  | 0,38 | 647  | 10 | 720  | 23 | 954  | 82  | 68         |
| b38 | 7002   | 123 | 15  | 0,68 | 11387 | 0,10935 | 2,0  | 0,94303  | 2,6  | 0,06254 | 1,7  | 0,77 | 669  | 13 | 674  | 13 | 693  | 36  | <b>97</b>  |
| b39 | 81137  | 312 | 109 | 0,68 | 77509 | 0,31422 | 1,5  | 4,61805  | 1,8  | 0,10659 | 0,9  | 0,85 | 1761 | 23 | 1753 | 15 | 1742 | 17  | <b>101</b> |
| b40 | 9069   | 135 | 19  | 0,50 | 13758 | 0,13235 | 2,0  | 1,22063  | 3,0  | 0,06689 | 2,2  | 0,68 | 801  | 15 | 810  | 17 | 834  | 46  | <b>96</b>  |
| b41 | 2894   | 128 | 7   | 0,57 | 2054  | 0,05000 | 1,9  | 0,38060  | 4,0  | 0,05520 | 3,5  | 0,47 | 315  | 6  | 327  | 11 | 420  | 79  | 75         |
| b42 | 2174   | 46  | 6   | 1,18 | 3472  | 0,10139 | 2,2  | 0,88606  | 6,5  | 0,06338 | 6,1  | 0,35 | 623  | 13 | 644  | 31 | 721  | 129 | 86         |
| b43 | 4557   | 100 | 14  | 1,93 | 7698  | 0,10085 | 2,2  | 0,84689  | 4,2  | 0,06090 | 3,6  | 0,52 | 619  | 13 | 623  | 20 | 636  | 77  | <b>97</b>  |
| b44 | 5121   | 289 | 13  | 0,35 | 1174  | 0,04366 | 3,6  | 0,37067  | 5,2  | 0,06157 | 3,8  | 0,68 | 275  | 10 | 320  | 14 | 659  | 82  | 42         |
| b45 | 2604   | 54  | 6   | 0,47 | 4219  | 0,10745 | 1,7  | 0,93216  | 4,2  | 0,06292 | 3,9  | 0,39 | 658  | 10 | 669  | 21 | 706  | 83  | <b>93</b>  |
| b46 | 6759   | 326 | 17  | 0,19 | 12710 | 0,05525 | 1,9  | 0,41223  | 3,6  | 0,05411 | 3,1  | 0,52 | 347  | 6  | 350  | 11 | 376  | 69  | <b>92</b>  |
| b47 | 6988   | 342 | 11  | 0,35 | 1048  | 0,02767 | 10,4 | 0,26712  | 11,5 | 0,07001 | 5,0  | 0,90 | 176  | 18 | 240  | 25 | 929  | 102 | 19         |



|     |        |      |     |      |       |         |     |          |      |         |      |      |      |    |      |    |      |     |            |
|-----|--------|------|-----|------|-------|---------|-----|----------|------|---------|------|------|------|----|------|----|------|-----|------------|
| b48 | 13767  | 421  | 33  | 0,55 | 4005  | 0,07546 | 3,2 | 0,65413  | 3,7  | 0,06287 | 1,9  | 0,86 | 469  | 14 | 511  | 15 | 704  | 40  | 67         |
| b49 | 13017  | 447  | 14  | 0,07 | 3756  | 0,03171 | 5,1 | 0,28728  | 6,1  | 0,06571 | 3,3  | 0,84 | 201  | 10 | 256  | 14 | 797  | 70  | 25         |
| b50 | 15327  | 783  | 51  | 0,59 | 3413  | 0,06289 | 4,4 | 0,56118  | 6,4  | 0,06472 | 4,7  | 0,69 | 393  | 17 | 452  | 24 | 765  | 99  | 51         |
| b51 | 2610   | 69   | 7   | 1,03 | 409   | 0,08435 | 1,8 | 0,72988  | 7,3  | 0,06276 | 7,0  | 0,24 | 522  | 9  | 556  | 32 | 700  | 150 | 75         |
| b52 | 5776   | 317  | 17  | 0,49 | 2804  | 0,05188 | 2,1 | 0,39887  | 4,1  | 0,05576 | 3,6  | 0,50 | 326  | 7  | 341  | 12 | 443  | 79  | 74         |
| b53 | 36304  | 1130 | 62  | 0,54 | 2338  | 0,03912 | 2,4 | 0,66099  | 2,9  | 0,12256 | 1,6  | 0,83 | 247  | 6  | 515  | 12 | 1994 | 28  | 12         |
| b54 | 2823   | 94   | 10  | 1,50 | 822   | 0,08525 | 3,9 | 0,83729  | 11,4 | 0,07124 | 10,7 | 0,34 | 527  | 20 | 618  | 54 | 964  | 219 | 55         |
| b55 | 9850   | 270  | 25  | 0,41 | 16670 | 0,09063 | 1,4 | 0,75101  | 2,2  | 0,06010 | 1,7  | 0,65 | 559  | 8  | 569  | 10 | 607  | 36  | <b>92</b>  |
| b56 | 11468  | 38   | 16  | 0,72 | 9319  | 0,37284 | 1,6 | 6,44037  | 2,6  | 0,12528 | 2,1  | 0,62 | 2043 | 28 | 2038 | 23 | 2033 | 37  | <b>100</b> |
| b57 | 43995  | 125  | 47  | 0,55 | 7591  | 0,33069 | 2,6 | 6,57162  | 2,9  | 0,14413 | 1,4  | 0,88 | 1842 | 41 | 2056 | 26 | 2277 | 24  | 81         |
| b58 | 52820  | 193  | 71  | 0,45 | 24656 | 0,33866 | 1,5 | 5,73100  | 1,8  | 0,12273 | 0,9  | 0,85 | 1880 | 25 | 1936 | 15 | 1996 | 17  | <b>94</b>  |
| b59 | 12229  | 1247 | 28  | 0,26 | 1119  | 0,02112 | 2,4 | 0,21427  | 4,0  | 0,07359 | 3,2  | 0,61 | 135  | 3  | 197  | 7  | 1030 | 64  | 13         |
| b60 | 41237  | 271  | 60  | 0,81 | 2639  | 0,18995 | 1,5 | 3,45923  | 1,8  | 0,13208 | 0,9  | 0,85 | 1121 | 16 | 1518 | 14 | 2126 | 17  | 53         |
| b61 | 169191 | 459  | 188 | 0,82 | 26412 | 0,33954 | 1,4 | 6,63788  | 2,2  | 0,14179 | 1,8  | 0,60 | 1884 | 22 | 2064 | 20 | 2249 | 31  | 84         |
| b62 | 7534   | 328  | 20  | 0,43 | 1211  | 0,05539 | 1,9 | 0,51882  | 4,0  | 0,06793 | 3,5  | 0,46 | 348  | 6  | 424  | 14 | 866  | 74  | 40         |
| b63 | 69654  | 139  | 71  | 0,23 | 42500 | 0,46883 | 3,5 | 10,77772 | 4,0  | 0,16673 | 2,0  | 0,87 | 2478 | 73 | 2504 | 38 | 2525 | 34  | <b>98</b>  |
| b64 | 3474   | 193  | 12  | 0,92 | 6603  | 0,05731 | 1,8 | 0,42223  | 4,6  | 0,05343 | 4,2  | 0,38 | 359  | 6  | 358  | 14 | 347  | 96  | <b>103</b> |
| b65 | 2330   | 70   | 8   | 1,11 | 1215  | 0,09395 | 1,4 | 0,81300  | 13,6 | 0,06276 | 13,5 | 0,10 | 579  | 7  | 604  | 64 | 700  | 287 | 83         |
| b66 | 16664  | 3613 | 46  | 0,13 | 264   | 0,01058 | 3,8 | 0,16262  | 7,1  | 0,11145 | 6,0  | 0,53 | 68   | 3  | 153  | 10 | 1823 | 109 | 4          |
| b67 | 5879   | 409  | 16  | 0,53 | 536   | 0,03382 | 2,0 | 0,24167  | 8,2  | 0,05183 | 7,9  | 0,25 | 214  | 4  | 220  | 16 | 278  | 182 | 77         |
| b68 | 9851   | 112  | 23  | 0,71 | 12235 | 0,18679 | 1,6 | 2,10752  | 3,7  | 0,08183 | 3,3  | 0,43 | 1104 | 16 | 1151 | 26 | 1241 | 66  | 89         |
| b69 | 11026  | 1783 | 50  | 0,65 | 1054  | 0,02475 | 4,2 | 0,23417  | 5,6  | 0,06862 | 3,7  | 0,75 | 158  | 7  | 214  | 11 | 887  | 77  | 18         |
| b70 | 1631   | 115  | 8   | 0,35 | 2786  | 0,07197 | 1,7 | 0,59386  | 5,1  | 0,05985 | 4,8  | 0,34 | 448  | 7  | 473  | 19 | 598  | 103 | 75         |
| b71 | 11330  | 738  | 40  | 0,51 | 21245 | 0,05190 | 1,4 | 0,38740  | 2,3  | 0,05414 | 1,9  | 0,60 | 326  | 4  | 332  | 7  | 377  | 42  | 87         |
| b72 | 6506   | 199  | 21  | 0,56 | 2697  | 0,09884 | 1,8 | 0,82263  | 2,9  | 0,06036 | 2,3  | 0,62 | 608  | 11 | 610  | 13 | 617  | 49  | <b>99</b>  |
| b73 | 2033   | 123  | 7   | 0,44 | 2504  | 0,05764 | 1,5 | 0,44921  | 5,6  | 0,05653 | 5,4  | 0,26 | 361  | 5  | 377  | 18 | 473  | 120 | 76         |
| b74 | 10271  | 436  | 35  | 0,56 | 1760  | 0,07174 | 2,8 | 0,68630  | 3,5  | 0,06939 | 2,1  | 0,80 | 447  | 12 | 531  | 15 | 910  | 44  | 49         |
| b75 | 2153   | 123  | 7   | 0,72 | 575   | 0,05234 | 1,7 | 0,46372  | 9,0  | 0,06426 | 8,8  | 0,19 | 329  | 6  | 387  | 29 | 750  | 187 | 44         |
| b76 | 99649  | 539  | 160 | 0,57 | 1325  | 0,26022 | 2,7 | 5,14758  | 3,0  | 0,14347 | 1,3  | 0,89 | 1491 | 36 | 1844 | 26 | 2269 | 23  | 66         |
| b77 | 20758  | 650  | 64  | 0,28 | 34534 | 0,10017 | 1,5 | 0,84479  | 2,1  | 0,06116 | 1,5  | 0,70 | 615  | 9  | 622  | 10 | 645  | 32  | <b>95</b>  |
| b78 | 10192  | 333  | 36  | 0,53 | 17530 | 0,10230 | 1,8 | 0,83571  | 3,5  | 0,05925 | 2,9  | 0,53 | 628  | 11 | 617  | 16 | 576  | 64  | <b>109</b> |
| b79 | 11205  | 795  | 47  | 0,70 | 21107 | 0,05408 | 1,7 | 0,40291  | 2,7  | 0,05403 | 2,1  | 0,64 | 340  | 6  | 344  | 8  | 373  | 47  | <b>91</b>  |
| b80 | 10000  | 125  | 33  | 2,27 | 10082 | 0,18124 | 1,2 | 2,52102  | 3,1  | 0,10089 | 2,8  | 0,38 | 1074 | 12 | 1278 | 23 | 1640 | 53  | 65         |

|      |        |      |     |      |        |         |     |          |      |         |      |      |      |    |      |    |      |     |            |
|------|--------|------|-----|------|--------|---------|-----|----------|------|---------|------|------|------|----|------|----|------|-----|------------|
| b81  | 2238   | 161  | 10  | 0,56 | 4225   | 0,05866 | 1,5 | 0,43677  | 4,8  | 0,05401 | 4,6  | 0,31 | 367  | 5  | 368  | 15 | 371  | 102 | <b>99</b>  |
| b82  | 65725  | 379  | 169 | 0,41 | 9586   | 0,40944 | 1,7 | 7,45780  | 2,1  | 0,13211 | 1,2  | 0,82 | 2212 | 32 | 2168 | 19 | 2126 | 21  | <b>104</b> |
| b83  | 15362  | 556  | 51  | 0,00 | 9800   | 0,10063 | 1,3 | 0,84555  | 2,5  | 0,06094 | 2,1  | 0,53 | 618  | 8  | 622  | 12 | 637  | 45  | <b>97</b>  |
| b84  | 36274  | 206  | 85  | 1,00 | 11817  | 0,34409 | 1,7 | 5,46067  | 2,0  | 0,11510 | 1,1  | 0,84 | 1906 | 28 | 1894 | 18 | 1881 | 20  | <b>101</b> |
| b85  | 4655   | 483  | 18  | 0,34 | 3484   | 0,03614 | 1,9 | 0,31849  | 4,2  | 0,06392 | 3,8  | 0,44 | 229  | 4  | 281  | 10 | 739  | 80  | 31         |
| b86  | 8425   | 489  | 45  | 1,54 | 15164  | 0,07186 | 1,5 | 0,55286  | 2,8  | 0,05580 | 2,4  | 0,53 | 447  | 6  | 447  | 10 | 444  | 53  | <b>101</b> |
| b87  | 8010   | 302  | 36  | 1,43 | 3835   | 0,09350 | 1,3 | 0,79391  | 2,7  | 0,06158 | 2,3  | 0,49 | 576  | 7  | 593  | 12 | 660  | 50  | 87         |
| b88  | 327244 | 983  | 527 | 0,50 | 127789 | 0,48195 | 1,4 | 11,23832 | 1,6  | 0,16912 | 0,8  | 0,87 | 2536 | 30 | 2543 | 15 | 2549 | 13  | <b>99</b>  |
| b89  | 9322   | 337  | 40  | 0,91 | 14682  | 0,10361 | 1,5 | 0,92386  | 3,2  | 0,06467 | 2,8  | 0,47 | 636  | 9  | 664  | 16 | 764  | 59  | 83         |
| b90  | 6325   | 286  | 32  | 1,51 | 3649   | 0,08700 | 1,6 | 0,73287  | 6,8  | 0,06109 | 6,6  | 0,24 | 538  | 8  | 558  | 30 | 643  | 142 | 84         |
| b91  | 4733   | 319  | 23  | 0,74 | 1131   | 0,06664 | 1,1 | 0,60995  | 10,8 | 0,06639 | 10,8 | 0,11 | 416  | 5  | 484  | 43 | 819  | 225 | 51         |
| b92  | 10260  | 934  | 56  | 0,42 | 1434   | 0,05899 | 1,8 | 0,51510  | 3,6  | 0,06333 | 3,1  | 0,50 | 369  | 6  | 422  | 13 | 719  | 66  | 51         |
| b93  | 9298   | 405  | 49  | 1,15 | 3416   | 0,10087 | 1,8 | 0,89319  | 2,8  | 0,06422 | 2,2  | 0,64 | 619  | 11 | 648  | 14 | 749  | 46  | 83         |
| b94  | 10620  | 1650 | 54  | 0,49 | 1003   | 0,03095 | 5,0 | 0,30489  | 6,4  | 0,07144 | 4,0  | 0,78 | 197  | 10 | 270  | 15 | 970  | 81  | 20         |
| b95  | 2668   | 236  | 14  | 0,45 | 4953   | 0,05779 | 1,8 | 0,43405  | 5,0  | 0,05448 | 4,7  | 0,35 | 362  | 6  | 366  | 16 | 391  | 106 | 93         |
| b96  | 14388  | 6158 | 91  | 0,24 | 6285   | 0,01360 | 2,2 | 0,11539  | 2,8  | 0,06153 | 1,7  | 0,79 | 87   | 2  | 111  | 3  | 658  | 37  | 13         |
| b97  | 4314   | 382  | 26  | 0,89 | 7965   | 0,06045 | 1,9 | 0,45876  | 3,4  | 0,05504 | 2,8  | 0,55 | 378  | 7  | 383  | 11 | 414  | 64  | 91         |
| b98  | 49794  | 602  | 138 | 0,31 | 4982   | 0,21800 | 3,4 | 2,85503  | 3,6  | 0,09499 | 1,4  | 0,92 | 1271 | 39 | 1370 | 28 | 1528 | 27  | 83         |
| b99  | 3738   | 338  | 21  | 0,50 | 7067   | 0,05832 | 1,6 | 0,43178  | 4,3  | 0,05369 | 4,0  | 0,37 | 365  | 6  | 364  | 13 | 358  | 90  | 102        |
| b100 | 2116   | 101  | 12  | 0,81 | 1353   | 0,10614 | 1,9 | 0,90277  | 4,7  | 0,06169 | 4,4  | 0,40 | 650  | 12 | 653  | 23 | 663  | 93  | 98         |
| b101 | 3495   | 180  | 19  | 0,56 | 1277   | 0,09992 | 2,6 | 0,84328  | 5,0  | 0,06121 | 4,2  | 0,52 | 614  | 15 | 621  | 23 | 647  | 91  | 95         |
| b102 | 18465  | 1228 | 85  | 0,13 | 1858   | 0,06963 | 1,8 | 0,67134  | 2,5  | 0,06993 | 1,7  | 0,72 | 434  | 8  | 522  | 10 | 926  | 36  | 47         |
| b103 | 12192  | 1590 | 53  | 0,23 | 3114   | 0,03337 | 1,8 | 0,27409  | 2,8  | 0,05957 | 2,2  | 0,64 | 212  | 4  | 246  | 6  | 588  | 47  | 36         |
| TM-1 |        |      |     |      |        |         |     |          |      |         |      |      |      |    |      |    |      |     |            |
| a1   | 18015  | 271  | 14  | 0,39 | 24592  | 0,05212 | 1,4 | 0,38568  | 2,2  | 0,05366 | 1,7  | 0,63 | 328  | 4  | 331  | 6  | 357  | 38  | <b>92</b>  |
| a2   | 59363  | 1050 | 54  | 0,07 | 2818   | 0,04889 | 2,7 | 0,35309  | 3,9  | 0,05238 | 2,8  | 0,69 | 308  | 8  | 307  | 10 | 302  | 65  | <b>102</b> |
| a3   | 100422 | 1628 | 88  | 0,04 | 17525  | 0,05289 | 1,4 | 0,37686  | 1,7  | 0,05168 | 0,9  | 0,84 | 332  | 4  | 325  | 5  | 271  | 21  | 123        |
| a4   | 38447  | 1385 | 44  | 0,07 | 556    | 0,02845 | 6,6 | 0,21276  | 7,4  | 0,05423 | 3,3  | 0,89 | 181  | 12 | 196  | 13 | 381  | 74  | 48         |
| a5   | 58503  | 1768 | 76  | 0,07 | 1415   | 0,03692 | 1,8 | 0,27458  | 2,7  | 0,05393 | 2,0  | 0,67 | 234  | 4  | 246  | 6  | 368  | 44  | 63         |
| a6   | 22753  | 589  | 45  | 0,66 | 15243  | 0,07414 | 1,1 | 0,55589  | 2,3  | 0,05438 | 2,0  | 0,49 | 461  | 5  | 449  | 8  | 387  | 44  | 119        |
| a7   | 12688  | 387  | 20  | 0,57 | 24104  | 0,04936 | 1,6 | 0,36548  | 2,9  | 0,05370 | 2,4  | 0,56 | 311  | 5  | 316  | 8  | 358  | 54  | 87         |
| a8   | 18052  | 553  | 29  | 0,61 | 7249   | 0,05062 | 2,8 | 0,38022  | 3,2  | 0,05447 | 1,5  | 0,88 | 318  | 9  | 327  | 9  | 391  | 34  | 81         |
| a9   | 25102  | 796  | 25  | 0,24 | 701    | 0,02615 | 6,1 | 0,27816  | 6,7  | 0,07716 | 2,6  | 0,92 | 166  | 10 | 249  | 15 | 1125 | 51  | 15         |

|     |       |      |     |      |       |          |      |          |      |         |      |      |     |     |      |     |      |     |            |
|-----|-------|------|-----|------|-------|----------|------|----------|------|---------|------|------|-----|-----|------|-----|------|-----|------------|
| a10 | 17568 | 524  | 28  | 0,78 | 1273  | 0,04779  | 3,3  | 0,42192  | 5,7  | 0,06404 | 4,7  | 0,58 | 301 | 10  | 357  | 17  | 743  | 98  | 41         |
| a11 | 18574 | 524  | 33  | 0,75 | 34103 | 0,05890  | 1,2  | 0,45202  | 3,1  | 0,05566 | 2,9  | 0,39 | 369 | 4   | 379  | 10  | 439  | 64  | 84         |
| a12 | 35759 | 1190 | 58  | 0,09 | 2032  | 0,04208  | 3,2  | 0,35201  | 5,2  | 0,06067 | 4,1  | 0,61 | 266 | 8   | 306  | 14  | 627  | 88  | 42         |
| a13 | 23377 | 825  | 43  | 0,67 | 3419  | 0,04959  | 2,1  | 0,35049  | 7,4  | 0,05126 | 7,1  | 0,29 | 312 | 7   | 305  | 20  | 252  | 163 | 124        |
| a14 | 78080 | 994  | 12  | 0,11 | 134   | -0,00807 | 19,1 | -0,06249 | 20,8 | 0,05615 | 8,1  | 0,92 | -52 | -10 | -66  | -14 | 458  | 179 | -11        |
| a15 | 18814 | 612  | 34  | 0,60 | 26087 | 0,05370  | 2,0  | 0,39605  | 2,8  | 0,05349 | 1,9  | 0,72 | 337 | 7   | 339  | 8   | 349  | 44  | <b>97</b>  |
| a16 | 20975 | 598  | 36  | 0,75 | 20742 | 0,05653  | 2,0  | 0,41642  | 2,6  | 0,05343 | 1,7  | 0,76 | 354 | 7   | 353  | 8   | 347  | 38  | <b>102</b> |
| a17 | 30442 | 897  | 61  | 0,10 | 5351  | 0,06153  | 2,0  | 0,48199  | 2,7  | 0,05681 | 1,8  | 0,75 | 385 | 8   | 399  | 9   | 484  | 40  | 79         |
| a18 | 15798 | 513  | 26  | 0,47 | 3545  | 0,05069  | 3,0  | 0,40209  | 3,6  | 0,05753 | 2,1  | 0,82 | 319 | 9   | 343  | 11  | 512  | 46  | 62         |
| a19 | 17601 | 575  | 28  | 0,75 | 1842  | 0,04583  | 3,2  | 0,39615  | 6,0  | 0,06269 | 5,1  | 0,53 | 289 | 9   | 339  | 18  | 698  | 110 | 41         |
| a20 | 16504 | 521  | 28  | 0,55 | 11358 | 0,05166  | 1,3  | 0,39352  | 1,9  | 0,05525 | 1,3  | 0,70 | 325 | 4   | 337  | 5   | 422  | 30  | 77         |
| a21 | 32785 | 1180 | 57  | 0,08 | 2436  | 0,04311  | 1,3  | 0,35073  | 2,3  | 0,05900 | 1,9  | 0,58 | 272 | 4   | 305  | 6   | 567  | 41  | 48         |
| a22 | 32664 | 1085 | 61  | 0,09 | 4735  | 0,04899  | 1,6  | 0,38508  | 2,1  | 0,05701 | 1,4  | 0,74 | 308 | 5   | 331  | 6   | 492  | 32  | 63         |
| a23 | 18992 | 694  | 34  | 0,59 | 4671  | 0,04796  | 1,7  | 0,36782  | 8,6  | 0,05562 | 8,4  | 0,19 | 302 | 5   | 318  | 24  | 437  | 187 | 69         |
| a24 | 28372 | 526  | 59  | 0,13 | 9368  | 0,11729  | 1,7  | 1,01546  | 2,7  | 0,06279 | 2,1  | 0,63 | 715 | 11  | 712  | 14  | 701  | 45  | <b>102</b> |
| a25 | 2556  | 152  | 9   | 0,20 | 4652  | 0,06226  | 2,9  | 0,48097  | 9,0  | 0,05603 | 8,5  | 0,32 | 389 | 11  | 399  | 30  | 453  | 190 | 86         |
| a26 | 41091 | 236  | 42  | 0,60 | 88    | 0,12765  | 1,4  | 3,91209  | 5,7  | 0,22228 | 5,6  | 0,24 | 774 | 10  | 1616 | 48  | 2997 | 90  | 26         |
| a27 | 16583 | 585  | 34  | 0,77 | 8591  | 0,05528  | 1,3  | 0,42104  | 1,7  | 0,05524 | 1,1  | 0,76 | 347 | 4   | 357  | 5   | 422  | 25  | 82         |
| a28 | 17888 | 617  | 34  | 0,54 | 10041 | 0,05293  | 1,8  | 0,39910  | 2,5  | 0,05469 | 1,7  | 0,73 | 332 | 6   | 341  | 7   | 400  | 38  | 83         |
| a29 | 19781 | 677  | 42  | 0,69 | 38217 | 0,05970  | 1,7  | 0,43463  | 2,2  | 0,05280 | 1,4  | 0,77 | 374 | 6   | 366  | 7   | 320  | 31  | 117        |
| a30 | 28787 | 1240 | 53  | 0,10 | 1357  | 0,04026  | 2,4  | 0,36421  | 4,0  | 0,06562 | 3,2  | 0,59 | 254 | 6   | 315  | 11  | 794  | 67  | 32         |
| a31 | 59109 | 2413 | 114 | 0,05 | 12868 | 0,04476  | 2,7  | 0,33101  | 3,0  | 0,05363 | 1,3  | 0,90 | 282 | 7   | 290  | 8   | 356  | 29  | 79         |
| a32 | 3267  | 667  | 17  | 1,25 | 800   | 0,02206  | 4,5  | 0,31152  | 11,8 | 0,10240 | 10,9 | 0,38 | 141 | 6   | 275  | 29  | 1668 | 202 | 8          |
| a33 | 18824 | 728  | 39  | 0,67 | 35642 | 0,05070  | 1,7  | 0,37644  | 2,6  | 0,05385 | 2,0  | 0,65 | 319 | 5   | 324  | 7   | 365  | 45  | 87         |
| a34 | 21484 | 1102 | 18  | 0,12 | 750   | 0,01162  | 14,5 | 0,11557  | 15,7 | 0,07211 | 5,9  | 0,93 | 74  | 11  | 111  | 17  | 989  | 119 | 8          |
| a35 | 7836  | 287  | 18  | 0,86 | 2509  | 0,05749  | 1,4  | 0,44710  | 3,3  | 0,05640 | 3,0  | 0,42 | 360 | 5   | 375  | 10  | 468  | 66  | 77         |
| a36 | 12138 | 453  | 26  | 0,93 | 21635 | 0,05137  | 2,0  | 0,40575  | 2,8  | 0,05729 | 1,9  | 0,73 | 323 | 6   | 346  | 8   | 503  | 42  | 64         |
| a37 | 13833 | 487  | 30  | 0,52 | 4313  | 0,05950  | 1,5  | 0,45408  | 2,3  | 0,05535 | 1,7  | 0,67 | 373 | 5   | 380  | 7   | 426  | 37  | 87         |
| a38 | 14889 | 568  | 31  | 0,48 | 7093  | 0,05377  | 1,5  | 0,41790  | 2,2  | 0,05636 | 1,6  | 0,67 | 338 | 5   | 355  | 7   | 467  | 36  | 72         |
| a39 | 23140 | 1002 | 39  | 0,11 | 984   | 0,03269  | 2,6  | 0,31420  | 3,8  | 0,06972 | 2,7  | 0,70 | 207 | 5   | 277  | 9   | 920  | 55  | 23         |
| a40 | 89912 | 3839 | 196 | 0,08 | 2369  | 0,04306  | 1,6  | 0,30229  | 2,5  | 0,05091 | 2,0  | 0,63 | 272 | 4   | 268  | 6   | 237  | 46  | 115        |
| a41 | 12857 | 511  | 28  | 0,52 | 21310 | 0,05297  | 1,7  | 0,39132  | 2,5  | 0,05358 | 1,8  | 0,67 | 333 | 5   | 335  | 7   | 354  | 42  | <b>94</b>  |
| a42 | 33145 | 1430 | 71  | 0,11 | 5082  | 0,04615  | 1,8  | 0,35427  | 3,7  | 0,05568 | 3,3  | 0,48 | 291 | 5   | 308  | 10  | 440  | 72  | 66         |

|     |        |      |     |      |       |         |      |           |      |         |      |      |      |      |      |      |      |      |            |
|-----|--------|------|-----|------|-------|---------|------|-----------|------|---------|------|------|------|------|------|------|------|------|------------|
| a43 | 16381  | 635  | 36  | 0,63 | 30794 | 0,05368 | 1,4  | 0,40166   | 2,0  | 0,05426 | 1,5  | 0,69 | 337  | 5    | 343  | 6    | 382  | 33   | 88         |
| a44 | 21704  | 867  | 52  | 0,72 | 2367  | 0,05711 | 1,2  | 0,45402   | 2,3  | 0,05765 | 1,9  | 0,54 | 358  | 4    | 380  | 7    | 517  | 43   | 69         |
| a45 | 12879  | 540  | 28  | 0,74 | 24213 | 0,04972 | 1,7  | 0,37218   | 2,5  | 0,05429 | 1,9  | 0,67 | 313  | 5    | 321  | 7    | 383  | 43   | 82         |
| a46 | 20003  | 804  | 45  | 0,63 | 37946 | 0,05390 | 2,0  | 0,39989   | 2,5  | 0,05381 | 1,5  | 0,80 | 338  | 7    | 342  | 7    | 363  | 34   | <b>93</b>  |
| a47 | 22621  | 910  | 57  | 0,79 | 42994 | 0,05788 | 1,4  | 0,42820   | 1,9  | 0,05365 | 1,4  | 0,72 | 363  | 5    | 362  | 6    | 357  | 31   | <b>102</b> |
| a48 | 20244  | 867  | 48  | 0,69 | 10881 | 0,05301 | 1,7  | 0,39105   | 2,2  | 0,05350 | 1,3  | 0,79 | 333  | 6    | 335  | 6    | 350  | 30   | <b>95</b>  |
| a49 | 18536  | 792  | 43  | 0,53 | 15543 | 0,05268 | 1,6  | 0,39412   | 2,1  | 0,05426 | 1,3  | 0,78 | 331  | 5    | 337  | 6    | 382  | 29   | 87         |
| a50 | 32326  | 1440 | 53  | 0,10 | 1625  | 0,02794 | 3,6  | 0,24228   | 4,3  | 0,06289 | 2,4  | 0,83 | 178  | 6    | 220  | 9    | 705  | 51   | 25         |
| a51 | 20511  | 832  | 49  | 0,64 | 8187  | 0,05604 | 1,6  | 0,42882   | 2,6  | 0,05550 | 2,0  | 0,63 | 351  | 6    | 362  | 8    | 432  | 44   | 81         |
| a52 | 22241  | 990  | 57  | 0,61 | 27103 | 0,05409 | 1,7  | 0,39785   | 2,3  | 0,05334 | 1,5  | 0,74 | 340  | 6    | 340  | 7    | 343  | 35   | <b>99</b>  |
| a53 | 12637  | 533  | 33  | 0,62 | 23702 | 0,06037 | 1,3  | 0,45240   | 2,3  | 0,05435 | 1,8  | 0,59 | 378  | 5    | 379  | 7    | 385  | 42   | <b>98</b>  |
| a54 | 11228  | 497  | 27  | 0,43 | 20624 | 0,05372 | 1,8  | 0,41200   | 3,5  | 0,05562 | 3,0  | 0,51 | 337  | 6    | 350  | 10   | 437  | 67   | 77         |
| a55 | 13911  | 631  | 36  | 0,65 | 26461 | 0,05376 | 1,6  | 0,39742   | 2,4  | 0,05362 | 1,9  | 0,64 | 338  | 5    | 340  | 7    | 355  | 43   | <b>95</b>  |
| a56 | 18598  | 690  | 26  | 0,69 | 1792  | 0,03079 | 3,9  | 0,26359   | 4,9  | 0,06209 | 3,0  | 0,78 | 195  | 7    | 238  | 10   | 677  | 65   | 29         |
| a57 | 10380  | 470  | 26  | 0,62 | 16676 | 0,05209 | 1,6  | 0,38596   | 3,1  | 0,05373 | 2,7  | 0,52 | 327  | 5    | 331  | 9    | 360  | 61   | <b>91</b>  |
| a58 | 32135  | 1627 | 90  | 0,09 | 798   | 0,05108 | 1,3  | 0,39395   | 4,2  | 0,05594 | 4,0  | 0,30 | 321  | 4    | 337  | 12   | 450  | 90   | 71         |
| a59 | 20914  | 978  | 56  | 0,65 | 11866 | 0,05418 | 2,2  | 0,40289   | 2,8  | 0,05393 | 1,7  | 0,78 | 340  | 7    | 344  | 8    | 368  | 39   | <b>92</b>  |
| a60 | 11529  | 551  | 30  | 0,68 | 20615 | 0,05051 | 1,5  | 0,37582   | 2,6  | 0,05396 | 2,2  | 0,57 | 318  | 5    | 324  | 7    | 369  | 49   | 86         |
| a61 | 24651  | 1310 | 48  | 0,13 | 595   | 0,03196 | 3,7  | 0,34837   | 4,4  | 0,07905 | 2,5  | 0,82 | 203  | 7    | 303  | 12   | 1174 | 50   | 17         |
| a62 | 18553  | 910  | 52  | 0,60 | 35418 | 0,05538 | 2,0  | 0,40802   | 2,5  | 0,05343 | 1,4  | 0,83 | 347  | 7    | 347  | 7    | 347  | 31   | <b>100</b> |
| a63 | 21588  | 1082 | 68  | 0,71 | 10744 | 0,06074 | 1,3  | 0,45934   | 2,0  | 0,05485 | 1,5  | 0,66 | 380  | 5    | 384  | 6    | 406  | 33   | <b>94</b>  |
| a64 | 26546  | 1435 | 61  | 0,12 | 1590  | 0,03575 | 1,2  | 0,27121   | 2,7  | 0,05502 | 2,4  | 0,44 | 226  | 3    | 244  | 6    | 413  | 54   | 55         |
| a65 | 20430  | 1005 | 56  | 0,64 | 1974  | 0,05282 | 1,0  | 0,43908   | 4,3  | 0,06029 | 4,2  | 0,24 | 332  | 3    | 370  | 14   | 614  | 91   | 54         |
| a66 | 22960  | 1517 | 57  | 0,14 | 2577  | 0,03363 | 2,2  | 0,28081   | 3,3  | 0,06055 | 2,5  | 0,67 | 213  | 5    | 251  | 7    | 623  | 53   | 34         |
| a67 | 31902  | 1633 | 79  | 0,09 | 1776  | 0,04317 | 1,6  | 0,37550   | 2,5  | 0,06308 | 1,9  | 0,63 | 272  | 4    | 324  | 7    | 711  | 41   | 38         |
| a68 | 25134  | 1465 | 59  | 0,19 | 1334  | 0,03592 | 1,3  | 0,31935   | 2,3  | 0,06448 | 1,9  | 0,56 | 227  | 3    | 281  | 6    | 757  | 41   | 30         |
| a69 | 21150  | 1127 | 66  | 0,70 | 20043 | 0,05532 | 2,1  | 0,41415   | 2,6  | 0,05430 | 1,6  | 0,79 | 347  | 7    | 352  | 8    | 383  | 35   | <b>91</b>  |
| a70 | 16045  | 1184 | 43  | 0,16 | 1077  | 0,03353 | 5,0  | 0,32913   | 7,1  | 0,07119 | 5,0  | 0,71 | 213  | 11   | 289  | 18   | 963  | 103  | 22         |
| a71 | 16655  | 847  | 44  | 0,63 | 18333 | 0,04829 | 1,4  | 0,36425   | 2,3  | 0,05471 | 1,9  | 0,59 | 304  | 4    | 315  | 6    | 400  | 42   | 76         |
| a72 | 14170  | 800  | 43  | 0,51 | 26774 | 0,05234 | 1,6  | 0,38960   | 2,4  | 0,05399 | 1,8  | 0,65 | 329  | 5    | 334  | 7    | 370  | 42   | 89         |
| a73 | 22706  | 970  | 63  | 0,80 | 630   | 0,05828 | 1,4  | 0,40941   | 8,2  | 0,05095 | 8,0  | 0,17 | 365  | 5    | 348  | 24   | 239  | 186  | 153        |
| a74 | 796045 | 182  | 622 | 2,07 | 4     | 1,40980 | 26,9 | 163,00443 | 90,6 | 0,83857 | 86,5 | 0,30 | 5670 | 1105 | 5178 | 2341 | 4989 | 1228 | 114        |
| a75 | 19217  | 1582 | 49  | 0,65 | 755   | 0,02830 | 4,2  | 0,33512   | 4,9  | 0,08587 | 2,5  | 0,86 | 180  | 7    | 293  | 12   | 1335 | 49   | 13         |

|      |         |      |      |      |       |         |     |          |     |         |     |      |      |    |      |    |      |     |            |
|------|---------|------|------|------|-------|---------|-----|----------|-----|---------|-----|------|------|----|------|----|------|-----|------------|
| a76  | 13982   | 1607 | 40   | 0,16 | 229   | 0,02025 | 1,5 | 0,37388  | 6,8 | 0,13391 | 6,6 | 0,22 | 129  | 2  | 323  | 19 | 2150 | 116 | 6          |
| a77  | 10070   | 602  | 31   | 0,40 | 18791 | 0,05203 | 1,9 | 0,39262  | 3,3 | 0,05472 | 2,7 | 0,58 | 327  | 6  | 336  | 9  | 401  | 59  | 82         |
| a78  | 21539   | 1436 | 75   | 0,54 | 5463  | 0,05079 | 1,9 | 0,39556  | 2,4 | 0,05649 | 1,5 | 0,79 | 319  | 6  | 338  | 7  | 472  | 33  | 68         |
| a79  | 24220   | 87   | 48   | 2,29 | 13931 | 0,38299 | 1,4 | 6,67356  | 2,2 | 0,12638 | 1,7 | 0,64 | 2090 | 26 | 2069 | 20 | 2048 | 30  | <b>102</b> |
| a80  | 7136    | 386  | 31   | 0,74 | 1823  | 0,07613 | 1,7 | 0,64293  | 5,2 | 0,06125 | 4,9 | 0,32 | 473  | 8  | 504  | 21 | 648  | 105 | 73         |
| a81  | 120314  | 2763 | 182  | 0,09 | 104   | 0,04979 | 3,3 | 0,38386  | 9,7 | 0,05592 | 9,1 | 0,34 | 313  | 10 | 330  | 28 | 449  | 203 | 70         |
| a82  | 13330   | 1009 | 54   | 0,84 | 4731  | 0,05149 | 1,6 | 0,39924  | 4,4 | 0,05623 | 4,1 | 0,37 | 324  | 5  | 341  | 13 | 462  | 92  | 70         |
| a83  | 23374   | 1443 | 77   | 0,45 | 2294  | 0,04713 | 2,7 | 0,34880  | 4,3 | 0,05368 | 3,3 | 0,63 | 297  | 8  | 304  | 11 | 358  | 75  | 83         |
| a84  | 15184   | 983  | 56   | 0,74 | 16595 | 0,05240 | 1,8 | 0,40039  | 2,9 | 0,05542 | 2,3 | 0,62 | 329  | 6  | 342  | 8  | 429  | 51  | 77         |
| a85  | 33382   | 3429 | 109  | 0,09 | 746   | 0,02721 | 1,5 | 0,30161  | 2,2 | 0,08040 | 1,7 | 0,67 | 173  | 3  | 268  | 5  | 1207 | 33  | 14         |
| a86  | 1206041 | 1541 | 1286 | 0,58 | 29    | 0,30379 | 2,3 | 26,83686 | 3,4 | 0,64070 | 2,5 | 0,67 | 1710 | 35 | 3378 | 34 | 4603 | 37  | 37         |
| a87  | 19944   | 1281 | 81   | 0,81 | 37718 | 0,05857 | 1,7 | 0,43600  | 2,8 | 0,05399 | 2,2 | 0,61 | 367  | 6  | 367  | 9  | 371  | 49  | <b>99</b>  |
| a88  | 15559   | 1262 | 63   | 0,65 | 4067  | 0,04812 | 1,8 | 0,35436  | 3,3 | 0,05341 | 2,7 | 0,56 | 303  | 5  | 308  | 9  | 346  | 61  | 88         |
| a89  | 20790   | 1414 | 78   | 0,80 | 1318  | 0,05071 | 3,0 | 0,45301  | 4,5 | 0,06479 | 3,3 | 0,67 | 319  | 9  | 379  | 14 | 767  | 70  | 42         |
| a90  | 24407   | 1726 | 93   | 0,34 | 2593  | 0,04803 | 1,3 | 0,34589  | 2,9 | 0,05223 | 2,6 | 0,46 | 302  | 4  | 302  | 8  | 296  | 59  | <b>102</b> |
| a91  | 22869   | 1651 | 101  | 0,75 | 12485 | 0,05710 | 1,4 | 0,42248  | 1,9 | 0,05366 | 1,3 | 0,73 | 358  | 5  | 358  | 6  | 357  | 30  | <b>100</b> |
| a92  | 14318   | 1152 | 61   | 0,63 | 20446 | 0,05105 | 1,6 | 0,38870  | 2,6 | 0,05522 | 2,0 | 0,64 | 321  | 5  | 333  | 7  | 421  | 44  | 76         |
| a93  | 48179   | 4136 | 182  | 0,06 | 9429  | 0,04059 | 1,8 | 0,29445  | 2,5 | 0,05261 | 1,7 | 0,72 | 256  | 4  | 262  | 6  | 312  | 39  | 82         |
| a94  | 21717   | 1778 | 98   | 0,70 | 6533  | 0,05215 | 1,4 | 0,39521  | 2,2 | 0,05497 | 1,7 | 0,61 | 328  | 4  | 338  | 6  | 411  | 39  | 80         |
| a95  | 17840   | 1272 | 85   | 0,70 | 8295  | 0,06317 | 1,1 | 0,48138  | 2,8 | 0,05527 | 2,5 | 0,41 | 395  | 4  | 399  | 9  | 423  | 56  | <b>93</b>  |
| a96  | 18453   | 1635 | 90   | 0,59 | 5232  | 0,05362 | 2,4 | 0,41485  | 3,1 | 0,05611 | 2,0 | 0,76 | 337  | 8  | 352  | 9  | 457  | 45  | 74         |
| a97  | 16246   | 1449 | 72   | 0,59 | 12809 | 0,04848 | 1,5 | 0,36843  | 2,4 | 0,05511 | 1,9 | 0,61 | 305  | 4  | 318  | 7  | 417  | 43  | 73         |
| a98  | 15642   | 1267 | 75   | 0,65 | 7448  | 0,05612 | 1,7 | 0,42716  | 2,9 | 0,05521 | 2,3 | 0,60 | 352  | 6  | 361  | 9  | 421  | 51  | 84         |
| a99  | 22447   | 1853 | 110  | 0,66 | 14887 | 0,05603 | 1,5 | 0,41719  | 2,3 | 0,05400 | 1,7 | 0,66 | 351  | 5  | 354  | 7  | 371  | 39  | <b>95</b>  |
| a100 | 32157   | 3321 | 183  | 0,10 | 5770  | 0,05276 | 2,2 | 0,38848  | 4,9 | 0,05340 | 4,4 | 0,45 | 331  | 7  | 333  | 14 | 346  | 99  | <b>96</b>  |
| a101 | 3438    | 911  | 50   | 0,58 | 2305  | 0,05423 | 2,3 | 0,43322  | 5,1 | 0,05794 | 4,5 | 0,45 | 340  | 7  | 365  | 16 | 527  | 99  | 65         |
| a102 | 8365    | 793  | 51   | 0,67 | 11158 | 0,06174 | 1,4 | 0,46059  | 2,8 | 0,05411 | 2,4 | 0,51 | 386  | 5  | 385  | 9  | 375  | 54  | <b>103</b> |
| a103 | 2267    | 197  | 12   | 0,77 | 921   | 0,05790 | 2,3 | 0,49968  | 6,3 | 0,06259 | 5,9 | 0,37 | 363  | 8  | 411  | 22 | 694  | 125 | 52         |
| a104 | 31371   | 3445 | 125  | 0,08 | 764   | 0,03092 | 2,7 | 0,33381  | 3,1 | 0,07830 | 1,5 | 0,88 | 196  | 5  | 292  | 8  | 1155 | 30  | 17         |
| a105 | 15002   | 1485 | 85   | 0,54 | 28652 | 0,05533 | 2,1 | 0,40789  | 2,7 | 0,05347 | 1,7 | 0,78 | 347  | 7  | 347  | 8  | 349  | 38  | <b>100</b> |
| a106 | 10664   | 1129 | 58   | 0,39 | 20289 | 0,05140 | 1,4 | 0,37981  | 2,2 | 0,05359 | 1,7 | 0,63 | 323  | 4  | 327  | 6  | 354  | 39  | <b>91</b>  |
| a107 | 3485    | 401  | 19   | 0,88 | 1242  | 0,04338 | 4,7 | 0,33442  | 8,2 | 0,05591 | 6,7 | 0,57 | 274  | 13 | 293  | 21 | 449  | 150 | 61         |
| a108 | 22870   | 2260 | 125  | 0,65 | 1910  | 0,05181 | 2,8 | 0,37597  | 3,7 | 0,05263 | 2,4 | 0,76 | 326  | 9  | 324  | 10 | 313  | 54  | <b>104</b> |

|      |        |      |     |      |       |         |     |         |     |         |     |      |      |    |      |    |      |    |           |
|------|--------|------|-----|------|-------|---------|-----|---------|-----|---------|-----|------|------|----|------|----|------|----|-----------|
| a109 | 14809  | 1540 | 102 | 0,79 | 2583  | 0,06223 | 1,8 | 0,53215 | 2,9 | 0,06202 | 2,3 | 0,60 | 389  | 7  | 433  | 10 | 675  | 50 | 58        |
| a110 | 15901  | 1838 | 98  | 0,64 | 5078  | 0,05092 | 1,5 | 0,39375 | 2,4 | 0,05608 | 1,9 | 0,60 | 320  | 5  | 337  | 7  | 455  | 43 | 70        |
| a111 | 30095  | 3843 | 204 | 0,56 | 57459 | 0,05101 | 1,6 | 0,37574 | 2,6 | 0,05343 | 2,0 | 0,63 | 321  | 5  | 324  | 7  | 347  | 46 | <b>92</b> |
| a112 | 19638  | 2391 | 118 | 0,77 | 1995  | 0,04372 | 2,7 | 0,37260 | 3,5 | 0,06181 | 2,2 | 0,78 | 276  | 7  | 322  | 10 | 668  | 47 | 41        |
| a113 | 23001  | 2762 | 188 | 0,69 | 5761  | 0,06519 | 1,2 | 0,50647 | 1,9 | 0,05635 | 1,5 | 0,64 | 407  | 5  | 416  | 7  | 466  | 33 | 87        |
| a114 | 17430  | 2260 | 118 | 0,63 | 19893 | 0,04933 | 1,6 | 0,36795 | 2,3 | 0,05410 | 1,6 | 0,71 | 310  | 5  | 318  | 6  | 375  | 37 | 83        |
| a115 | 14109  | 1865 | 98  | 0,52 | 6723  | 0,05078 | 1,3 | 0,37573 | 1,9 | 0,05366 | 1,5 | 0,66 | 319  | 4  | 324  | 5  | 357  | 33 | 89        |
| a116 | 6988   | 912  | 48  | 0,24 | 13009 | 0,05351 | 2,3 | 0,40483 | 3,4 | 0,05487 | 2,4 | 0,69 | 336  | 8  | 345  | 10 | 407  | 55 | 83        |
| a117 | 8466   | 1097 | 58  | 0,44 | 2684  | 0,05254 | 2,1 | 0,43392 | 5,0 | 0,05990 | 4,6 | 0,41 | 330  | 7  | 366  | 16 | 600  | 99 | 55        |
| a118 | 15934  | 1529 | 83  | 0,62 | 7546  | 0,05177 | 1,6 | 0,38256 | 2,2 | 0,05360 | 1,5 | 0,71 | 325  | 5  | 329  | 6  | 354  | 35 | <b>92</b> |
| a119 | 14230  | 1343 | 77  | 0,68 | 25443 | 0,05349 | 1,8 | 0,41002 | 2,9 | 0,05559 | 2,2 | 0,64 | 336  | 6  | 349  | 9  | 436  | 49 | 77        |
| a120 | 20087  | 2141 | 113 | 0,70 | 26402 | 0,04988 | 2,3 | 0,37616 | 3,1 | 0,05470 | 2,1 | 0,73 | 314  | 7  | 324  | 9  | 400  | 48 | 78        |
| TM-3 |        |      |     |      |       |         |     |         |     |         |     |      |      |    |      |    |      |    |           |
| a1   | 47445  | 2561 | 90  | 0,10 | 103   | 0,02316 | 2,2 | 0,65370 | 2,5 | 0,20467 | 1,2 | 0,88 | 148  | 3  | 511  | 10 | 2864 | 19 | 5         |
| a2   | 8169   | 471  | 31  | 1,01 | 790   | 0,05561 | 2,3 | 0,55270 | 4,3 | 0,07208 | 3,7 | 0,53 | 349  | 8  | 447  | 16 | 988  | 75 | 35        |
| a3   | 5433   | 249  | 21  | 0,29 | 9409  | 0,08501 | 2,1 | 0,69339 | 3,0 | 0,05915 | 2,1 | 0,71 | 526  | 11 | 535  | 13 | 573  | 46 | <b>92</b> |
| a4   | 58814  | 2628 | 91  | 0,24 | 110   | 0,02381 | 2,1 | 0,24654 | 4,7 | 0,07511 | 4,2 | 0,45 | 152  | 3  | 224  | 9  | 1071 | 84 | 14        |
| a5   | 4153   | 177  | 21  | 1,35 | 1698  | 0,09779 | 2,2 | 0,80997 | 4,0 | 0,06007 | 3,3 | 0,56 | 601  | 13 | 602  | 18 | 606  | 72 | <b>99</b> |
| a6   | 6696   | 472  | 25  | 0,01 | 12511 | 0,05895 | 2,1 | 0,44571 | 3,0 | 0,05483 | 2,1 | 0,70 | 369  | 8  | 374  | 9  | 405  | 48 | <b>91</b> |
| a7   | 12996  | 151  | 24  | 0,35 | 11711 | 0,14707 | 2,3 | 2,29910 | 3,0 | 0,11338 | 1,8 | 0,79 | 885  | 19 | 1212 | 21 | 1854 | 33 | 48        |
| a8   | 5801   | 209  | 25  | 1,81 | 1889  | 0,09105 | 2,1 | 0,85179 | 3,3 | 0,06785 | 2,6 | 0,63 | 562  | 11 | 626  | 16 | 864  | 53 | 65        |
| a9   | 111762 | 834  | 294 | 0,85 | 287   | 0,31217 | 2,2 | 4,79906 | 2,9 | 0,11150 | 1,8 | 0,78 | 1751 | 35 | 1785 | 24 | 1824 | 32 | <b>96</b> |
| a10  | 53978  | 398  | 118 | 1,30 | 1077  | 0,21741 | 3,0 | 4,02155 | 3,3 | 0,13416 | 1,4 | 0,91 | 1268 | 35 | 1639 | 27 | 2153 | 25 | 59        |
| a11  | 16361  | 587  | 57  | 0,36 | 3176  | 0,09525 | 2,0 | 0,87393 | 2,8 | 0,06655 | 2,0 | 0,70 | 586  | 11 | 638  | 14 | 824  | 42 | 71        |
| a12  | 10627  | 201  | 41  | 0,54 | 4138  | 0,19904 | 2,1 | 2,20209 | 3,9 | 0,08024 | 3,3 | 0,53 | 1170 | 22 | 1182 | 28 | 1203 | 65 | <b>97</b> |
| a13  | 47417  | 258  | 98  | 0,36 | 38854 | 0,36327 | 2,3 | 6,26307 | 2,4 | 0,12504 | 0,9 | 0,93 | 1998 | 39 | 2013 | 22 | 2029 | 16 | <b>98</b> |
| a14  | 45090  | 436  | 97  | 0,44 | 976   | 0,21918 | 2,3 | 2,82848 | 2,7 | 0,09360 | 1,5 | 0,84 | 1278 | 26 | 1363 | 20 | 1500 | 28 | 85        |
| a15  | 53500  | 1409 | 93  | 0,79 | 97    | 0,04236 | 2,1 | 1,21747 | 3,1 | 0,20845 | 2,2 | 0,68 | 267  | 6  | 809  | 17 | 2894 | 36 | 9         |
| a16  | 19821  | 99   | 44  | 1,09 | 16218 | 0,36733 | 2,2 | 6,34185 | 2,5 | 0,12522 | 1,2 | 0,87 | 2017 | 38 | 2024 | 22 | 2032 | 22 | <b>99</b> |
| a17  | 10951  | 458  | 48  | 0,77 | 3004  | 0,09942 | 2,2 | 0,83005 | 4,9 | 0,06055 | 4,3 | 0,46 | 611  | 13 | 614  | 23 | 623  | 93 | <b>98</b> |
| a18  | 10104  | 397  | 42  | 0,75 | 17245 | 0,09719 | 2,2 | 0,80434 | 3,1 | 0,06002 | 2,2 | 0,70 | 598  | 12 | 599  | 14 | 604  | 48 | <b>99</b> |
| a19  | 186548 | 1751 | 259 | 0,29 | 214   | 0,12276 | 2,6 | 2,59539 | 2,8 | 0,15333 | 1,0 | 0,93 | 746  | 19 | 1299 | 21 | 2383 | 17 | 31        |
| a20  | 23018  | 668  | 78  | 1,17 | 287   | 0,10052 | 3,1 | 0,84438 | 5,5 | 0,06093 | 4,5 | 0,56 | 617  | 18 | 622  | 26 | 637  | 98 | <b>97</b> |

|     |        |      |     |      |      |         |     |          |      |         |      |      |      |    |      |    |      |     |            |
|-----|--------|------|-----|------|------|---------|-----|----------|------|---------|------|------|------|----|------|----|------|-----|------------|
| a21 | 6401   | 353  | 28  | 0,74 | 2415 | 0,07323 | 2,1 | 0,57538  | 3,3  | 0,05699 | 2,6  | 0,62 | 456  | 9  | 461  | 12 | 491  | 57  | <b>93</b>  |
| a22 | 4611   | 129  | 19  | 1,36 | 3294 | 0,12026 | 2,1 | 1,23758  | 5,2  | 0,07464 | 4,8  | 0,40 | 732  | 14 | 818  | 30 | 1059 | 96  | 69         |
| a23 | 3859   | 197  | 10  | 0,59 | 381  | 0,04332 | 2,6 | 0,56079  | 4,6  | 0,09388 | 3,8  | 0,56 | 273  | 7  | 452  | 17 | 1506 | 71  | 18         |
| a24 | 18957  | 475  | 57  | 1,05 | 215  | 0,10679 | 2,5 | 1,02647  | 3,9  | 0,06972 | 3,0  | 0,64 | 654  | 15 | 717  | 20 | 920  | 62  | 71         |
| a25 | 11567  | 475  | 52  | 1,09 | 4755 | 0,09748 | 2,3 | 0,81382  | 3,1  | 0,06055 | 2,1  | 0,75 | 600  | 13 | 605  | 14 | 623  | 44  | <b>96</b>  |
| a26 | 9695   | 396  | 39  | 0,86 | 1500 | 0,08865 | 2,4 | 0,79993  | 3,3  | 0,06544 | 2,2  | 0,74 | 548  | 13 | 597  | 15 | 789  | 46  | 69         |
| a27 | 2643   | 92   | 16  | 4,53 | 906  | 0,09134 | 2,7 | 0,89054  | 8,9  | 0,07071 | 8,5  | 0,30 | 563  | 15 | 647  | 44 | 949  | 174 | 59         |
| a28 | 4391   | 122  | 11  | 0,73 | 451  | 0,07770 | 2,4 | 0,75567  | 10,7 | 0,07054 | 10,4 | 0,23 | 482  | 11 | 572  | 48 | 944  | 214 | 51         |
| a29 | 5748   | 225  | 24  | 0,72 | 3836 | 0,09775 | 2,0 | 0,80821  | 7,6  | 0,05997 | 7,3  | 0,27 | 601  | 12 | 601  | 35 | 602  | 159 | <b>100</b> |
| a30 | 13356  | 76   | 32  | 1,36 | 3318 | 0,33911 | 2,0 | 5,61822  | 3,0  | 0,12016 | 2,1  | 0,69 | 1882 | 33 | 1919 | 26 | 1959 | 38  | <b>96</b>  |
| a31 | 3506   | 119  | 20  | 3,01 | 2342 | 0,10450 | 2,1 | 0,87855  | 3,8  | 0,06098 | 3,1  | 0,57 | 641  | 13 | 640  | 18 | 638  | 67  | <b>100</b> |
| a32 | 155158 | 4218 | 168 | 0,10 | 31   | 0,01937 | 2,2 | 0,36661  | 7,5  | 0,13729 | 7,2  | 0,30 | 124  | 3  | 317  | 21 | 2193 | 125 | 6          |
| a33 | 25103  | 695  | 23  | 0,55 | 64   | 0,01193 | 7,1 | 0,41605  | 9,6  | 0,25303 | 6,5  | 0,74 | 76   | 5  | 353  | 29 | 3204 | 103 | 2          |
| a34 | 10666  | 341  | 37  | 1,42 | 450  | 0,08770 | 5,4 | 0,77197  | 12,3 | 0,06384 | 11,1 | 0,44 | 542  | 28 | 581  | 56 | 736  | 234 | 74         |
| a35 | 5053   | 106  | 20  | 1,18 | 7032 | 0,16921 | 3,2 | 1,70354  | 5,0  | 0,07302 | 3,9  | 0,64 | 1008 | 30 | 1010 | 33 | 1014 | 79  | <b>99</b>  |
| a36 | 13728  | 402  | 46  | 0,33 | 573  | 0,11358 | 2,1 | 0,98653  | 5,0  | 0,06299 | 4,5  | 0,42 | 694  | 14 | 697  | 25 | 708  | 96  | <b>98</b>  |
| a37 | 19840  | 337  | 67  | 0,23 | 2622 | 0,20049 | 2,0 | 2,31071  | 2,7  | 0,08359 | 1,9  | 0,73 | 1178 | 21 | 1216 | 20 | 1283 | 36  | <b>92</b>  |
| a38 | 5457   | 380  | 21  | 0,42 | 2209 | 0,05254 | 2,0 | 0,46038  | 4,0  | 0,06356 | 3,4  | 0,51 | 330  | 7  | 385  | 13 | 727  | 73  | 45         |
| a39 | 92584  | 1745 | 145 | 0,18 | 68   | 0,05384 | 2,1 | 0,56761  | 5,9  | 0,07646 | 5,5  | 0,36 | 338  | 7  | 456  | 22 | 1107 | 110 | 31         |
| a40 | 5309   | 307  | 23  | 0,41 | 2081 | 0,07348 | 2,3 | 0,57351  | 4,5  | 0,05661 | 3,8  | 0,51 | 457  | 10 | 460  | 17 | 476  | 85  | <b>96</b>  |
| a41 | 83757  | 2648 | 117 | 0,11 | 70   | 0,02261 | 2,9 | 0,80073  | 3,4  | 0,25681 | 1,8  | 0,85 | 144  | 4  | 597  | 16 | 3227 | 29  | 4          |
| a42 | 66354  | 2179 | 136 | 0,10 | 88   | 0,04176 | 2,2 | 1,28590  | 4,6  | 0,22331 | 4,0  | 0,49 | 264  | 6  | 839  | 26 | 3005 | 64  | 9          |
| a43 | 4309   | 207  | 12  | 0,57 | 318  | 0,05414 | 2,5 | 0,67969  | 9,7  | 0,09104 | 9,4  | 0,25 | 340  | 8  | 527  | 41 | 1448 | 179 | 23         |
| a44 | 7510   | 214  | 29  | 0,72 | 3616 | 0,12815 | 2,0 | 1,17309  | 2,9  | 0,06639 | 2,1  | 0,69 | 777  | 15 | 788  | 16 | 819  | 45  | <b>95</b>  |
| a45 | 3552   | 121  | 11  | 0,32 | 1212 | 0,08397 | 3,2 | 0,78059  | 5,0  | 0,06742 | 3,8  | 0,65 | 520  | 16 | 586  | 22 | 851  | 79  | 61         |
| a46 | 67535  | 2618 | 102 | 0,13 | 51   | 0,02540 | 1,9 | 0,34105  | 8,6  | 0,09738 | 8,4  | 0,23 | 162  | 3  | 298  | 22 | 1575 | 157 | 10         |
| a47 | 10474  | 444  | 27  | 0,55 | 293  | 0,05215 | 2,3 | 0,77031  | 3,3  | 0,10712 | 2,4  | 0,70 | 328  | 7  | 580  | 15 | 1751 | 43  | 19         |
| a48 | 6668   | 212  | 26  | 0,46 | 3911 | 0,12144 | 2,5 | 1,09348  | 5,7  | 0,06530 | 5,2  | 0,43 | 739  | 17 | 750  | 31 | 784  | 109 | <b>94</b>  |
| a49 | 76784  | 1479 | 119 | 0,75 | 72   | 0,04660 | 2,2 | 1,75206  | 3,0  | 0,27266 | 2,0  | 0,74 | 294  | 6  | 1028 | 20 | 3321 | 32  | 9          |
| a50 | 12488  | 520  | 73  | 2,72 | 4982 | 0,09693 | 2,0 | 0,80701  | 2,4  | 0,06038 | 1,3  | 0,84 | 596  | 11 | 601  | 11 | 617  | 27  | <b>97</b>  |
| a51 | 40425  | 2373 | 78  | 0,09 | 141  | 0,02262 | 3,5 | 0,52516  | 8,2  | 0,16836 | 7,4  | 0,43 | 144  | 5  | 429  | 29 | 2541 | 124 | 6          |
| a52 | 22615  | 57   | 36  | 1,21 | 4292 | 0,51577 | 2,8 | 13,44400 | 3,3  | 0,18905 | 1,9  | 0,83 | 2681 | 61 | 2711 | 32 | 2734 | 31  | <b>98</b>  |
| a53 | 12937  | 50   | 24  | 0,65 | 8002 | 0,43375 | 2,5 | 9,89343  | 3,1  | 0,16543 | 1,8  | 0,82 | 2323 | 50 | 2425 | 29 | 2512 | 30  | <b>92</b>  |

|        |        |      |     |      |       |         |     |         |      |         |      |      |      |    |      |    |      |     |            |
|--------|--------|------|-----|------|-------|---------|-----|---------|------|---------|------|------|------|----|------|----|------|-----|------------|
| a54    | 12582  | 516  | 48  | 0,95 | 1733  | 0,08100 | 2,2 | 0,74694 | 3,2  | 0,06688 | 2,3  | 0,70 | 502  | 11 | 566  | 14 | 834  | 48  | 60         |
| a55    | 90116  | 1528 | 135 | 0,25 | 64    | 0,04651 | 2,0 | 1,88469 | 3,4  | 0,29388 | 2,8  | 0,58 | 293  | 6  | 1076 | 23 | 3438 | 44  | 9          |
| a56    | 6724   | 530  | 31  | 0,52 | 3181  | 0,05622 | 2,0 | 0,41686 | 2,8  | 0,05378 | 1,9  | 0,72 | 353  | 7  | 354  | 8  | 362  | 43  | <b>97</b>  |
| a57    | 251334 | 4370 | 291 | 0,09 | 25    | 0,02321 | 2,9 | 2,13144 | 3,3  | 0,66599 | 1,6  | 0,88 | 148  | 4  | 1159 | 23 | 4659 | 23  | 3          |
| a58    | 27839  | 180  | 74  | 1,01 | 2476  | 0,35039 | 2,2 | 5,75725 | 3,4  | 0,11917 | 2,6  | 0,64 | 1936 | 36 | 1940 | 30 | 1944 | 46  | <b>100</b> |
| a59    | 8749   | 376  | 32  | 0,38 | 15053 | 0,08578 | 1,9 | 0,70370 | 2,7  | 0,05950 | 1,9  | 0,72 | 531  | 10 | 541  | 11 | 585  | 40  | <b>91</b>  |
| a60    | 247    | 18   | 1   | 0,41 | 474   | 0,05778 | 4,7 | 0,43254 | 16,9 | 0,05429 | 16,3 | 0,28 | 362  | 17 | 365  | 53 | 383  | 365 | <b>94</b>  |
| a61    | 2216   | 153  | 9   | 0,54 | 2568  | 0,05386 | 2,6 | 0,46435 | 6,4  | 0,06253 | 5,9  | 0,41 | 338  | 9  | 387  | 21 | 692  | 125 | 49         |
| a62    | 41592  | 1132 | 86  | 0,77 | 103   | 0,05961 | 5,2 | 0,59863 | 12,1 | 0,07284 | 10,9 | 0,43 | 373  | 19 | 476  | 47 | 1009 | 222 | 37         |
| a63    | 3626   | 225  | 14  | 0,39 | 665   | 0,06180 | 2,6 | 0,56041 | 4,8  | 0,06576 | 4,1  | 0,53 | 387  | 10 | 452  | 18 | 799  | 86  | 48         |
| a64    | 5041   | 283  | 22  | 0,69 | 4716  | 0,07408 | 2,5 | 0,58428 | 3,8  | 0,05720 | 2,8  | 0,67 | 461  | 11 | 467  | 14 | 499  | 63  | <b>92</b>  |
| a65    | 72258  | 2383 | 120 | 0,09 | 76    | 0,03000 | 2,0 | 1,09253 | 4,2  | 0,26412 | 3,7  | 0,48 | 191  | 4  | 750  | 22 | 3271 | 58  | 6          |
| a66    | 43897  | 1139 | 103 | 0,70 | 260   | 0,07795 | 2,4 | 0,70653 | 3,0  | 0,06574 | 1,8  | 0,80 | 484  | 11 | 543  | 13 | 798  | 38  | 61         |
| a67    | 1163   | 78   | 5   | 1,06 | 2027  | 0,06085 | 2,5 | 0,49498 | 5,7  | 0,05899 | 5,1  | 0,43 | 381  | 9  | 408  | 19 | 567  | 112 | 67         |
| a68    | 914    | 61   | 4   | 0,82 | 538   | 0,05866 | 2,0 | 0,47046 | 7,2  | 0,05817 | 6,9  | 0,28 | 367  | 7  | 392  | 24 | 536  | 151 | 69         |
| a69    | 6277   | 99   | 22  | 1,75 | 695   | 0,16477 | 2,5 | 1,68766 | 7,8  | 0,07428 | 7,4  | 0,32 | 983  | 23 | 1004 | 51 | 1049 | 149 | <b>94</b>  |
| a70    | 1334   | 74   | 6   | 0,43 | 2372  | 0,07411 | 2,3 | 0,58040 | 6,3  | 0,05680 | 5,8  | 0,36 | 461  | 10 | 465  | 24 | 484  | 129 | <b>95</b>  |
| a71    | 2414   | 113  | 8   | 0,33 | 633   | 0,07084 | 2,6 | 0,77803 | 4,6  | 0,07965 | 3,8  | 0,57 | 441  | 11 | 584  | 21 | 1188 | 75  | 37         |
| a72    | 7106   | 296  | 30  | 0,66 | 10124 | 0,09531 | 2,1 | 0,78876 | 3,0  | 0,06002 | 2,2  | 0,69 | 587  | 12 | 590  | 14 | 604  | 48  | <b>97</b>  |
| a73    | 4625   | 312  | 21  | 1,17 | 4458  | 0,05659 | 2,3 | 0,45768 | 3,7  | 0,05866 | 2,9  | 0,62 | 355  | 8  | 383  | 12 | 554  | 63  | 64         |
| a74    | 4665   | 373  | 19  | 0,42 | 2511  | 0,05142 | 2,1 | 0,39431 | 3,7  | 0,05562 | 3,0  | 0,58 | 323  | 7  | 338  | 11 | 437  | 66  | 74         |
| a75    | 1527   | 121  | 8   | 1,35 | 2923  | 0,05423 | 2,5 | 0,39917 | 6,9  | 0,05338 | 6,5  | 0,36 | 340  | 8  | 341  | 20 | 345  | 147 | <b>99</b>  |
| a76    | 51974  | 204  | 81  | 0,47 | 6688  | 0,35623 | 2,1 | 7,47417 | 2,2  | 0,15217 | 0,8  | 0,94 | 1964 | 35 | 2170 | 20 | 2370 | 13  | 83         |
| a77    | 6099   | 310  | 27  | 0,74 | 10837 | 0,08059 | 2,2 | 0,64218 | 3,4  | 0,05779 | 2,5  | 0,67 | 500  | 11 | 504  | 13 | 522  | 55  | <b>96</b>  |
| a78    | 18231  | 1215 | 72  | 0,69 | 478   | 0,05557 | 2,2 | 0,41133 | 3,7  | 0,05368 | 3,0  | 0,60 | 349  | 8  | 350  | 11 | 358  | 67  | <b>97</b>  |
| a79    | 3746   | 258  | 13  | 0,54 | 6653  | 0,04785 | 4,8 | 0,37691 | 6,0  | 0,05713 | 3,7  | 0,79 | 301  | 14 | 325  | 17 | 497  | 81  | 61         |
| a80    | 4377   | 321  | 18  | 0,34 | 3608  | 0,05574 | 2,1 | 0,44291 | 3,7  | 0,05763 | 3,1  | 0,56 | 350  | 7  | 372  | 12 | 516  | 68  | 68         |
| a81    | 45435  | 351  | 98  | 0,53 | 38021 | 0,25894 | 2,0 | 3,82953 | 2,2  | 0,10726 | 0,8  | 0,93 | 1484 | 27 | 1599 | 18 | 1753 | 15  | 85         |
| a82    | 3524   | 188  | 15  | 0,43 | 6263  | 0,07661 | 2,5 | 0,60814 | 4,2  | 0,05757 | 3,3  | 0,61 | 476  | 12 | 482  | 16 | 514  | 73  | <b>93</b>  |
| CBR-11 |        |      |     |      |       |         |     |         |      |         |      |      |      |    |      |    |      |     |            |
| a083   | 6068   | 463  | 39  | 0,84 | 3276  | 0,07580 | 2,1 | 0,61415 | 3,1  | 0,05876 | 2,2  | 0,68 | 471  | 10 | 486  | 12 | 558  | 49  | 84         |
| a084   | 7495   | 187  | 42  | 1,29 | 10218 | 0,18394 | 2,4 | 1,90735 | 3,1  | 0,07521 | 1,9  | 0,79 | 1088 | 24 | 1084 | 21 | 1074 | 38  | <b>101</b> |
| a085   | 7159   | 491  | 37  | 0,44 | 1759  | 0,07473 | 2,0 | 0,63218 | 4,8  | 0,06136 | 4,4  | 0,41 | 465  | 9  | 497  | 19 | 652  | 95  | 71         |



|      |        |      |     |      |       |         |     |          |     |         |     |      |      |    |      |    |      |     |            |
|------|--------|------|-----|------|-------|---------|-----|----------|-----|---------|-----|------|------|----|------|----|------|-----|------------|
| a086 | 2098   | 277  | 17  | 0,90 | 1950  | 0,05517 | 2,7 | 0,40806  | 5,7 | 0,05364 | 5,0 | 0,48 | 346  | 9  | 347  | 17 | 356  | 113 | <b>97</b>  |
| a087 | 4503   | 459  | 29  | 0,75 | 1207  | 0,05724 | 2,1 | 0,46902  | 5,2 | 0,05943 | 4,8 | 0,41 | 359  | 7  | 391  | 17 | 583  | 103 | 62         |
| a088 | 7485   | 547  | 47  | 0,61 | 13217 | 0,08299 | 2,2 | 0,66298  | 3,0 | 0,05794 | 2,1 | 0,73 | 514  | 11 | 516  | 12 | 528  | 45  | <b>97</b>  |
| a089 | 1193   | 54   | 8   | 1,69 | 1776  | 0,11950 | 2,8 | 1,13165  | 6,3 | 0,06868 | 5,6 | 0,45 | 728  | 20 | 769  | 35 | 889  | 116 | 82         |
| a090 | 4963   | 359  | 30  | 0,20 | 7191  | 0,08614 | 2,3 | 0,71656  | 3,3 | 0,06033 | 2,4 | 0,68 | 533  | 12 | 549  | 14 | 615  | 53  | 87         |
| a091 | 7516   | 797  | 48  | 0,87 | 2132  | 0,05339 | 2,2 | 0,48181  | 5,7 | 0,06545 | 5,3 | 0,39 | 335  | 7  | 399  | 19 | 789  | 110 | 43         |
| a092 | 3829   | 494  | 33  | 1,14 | 5665  | 0,05724 | 2,4 | 0,42376  | 7,6 | 0,05369 | 7,2 | 0,32 | 359  | 8  | 359  | 23 | 358  | 162 | <b>100</b> |
| a093 | 1357   | 166  | 10  | 0,97 | 2524  | 0,05346 | 2,1 | 0,40739  | 5,3 | 0,05527 | 4,8 | 0,41 | 336  | 7  | 347  | 16 | 423  | 107 | 79         |
| a094 | 64755  | 962  | 242 | 0,85 | 915   | 0,22594 | 2,4 | 4,38380  | 2,6 | 0,14072 | 1,0 | 0,92 | 1313 | 29 | 1709 | 22 | 2236 | 17  | 59         |
| a095 | 5809   | 506  | 44  | 0,73 | 4454  | 0,08257 | 2,6 | 0,66137  | 3,4 | 0,05809 | 2,1 | 0,78 | 511  | 13 | 515  | 14 | 533  | 46  | <b>96</b>  |
| a096 | 7768   | 579  | 53  | 0,54 | 12930 | 0,08804 | 2,0 | 0,74772  | 2,8 | 0,06160 | 1,9 | 0,71 | 544  | 10 | 567  | 12 | 660  | 42  | 82         |
| a097 | 139413 | 1379 | 590 | 0,68 | 1484  | 0,40252 | 2,9 | 7,69918  | 3,2 | 0,13873 | 1,3 | 0,91 | 2181 | 54 | 2197 | 29 | 2211 | 23  | <b>99</b>  |
| a098 | 74116  | 605  | 301 | 0,78 | 1558  | 0,45065 | 2,0 | 10,31997 | 2,2 | 0,16609 | 0,9 | 0,90 | 2398 | 39 | 2464 | 20 | 2519 | 16  | <b>95</b>  |
| a099 | 13535  | 894  | 100 | 0,96 | 3201  | 0,09800 | 2,0 | 0,82034  | 3,8 | 0,06071 | 3,2 | 0,54 | 603  | 12 | 608  | 17 | 629  | 68  | <b>96</b>  |
| a100 | 5239   | 832  | 51  | 0,94 | 9965  | 0,05588 | 2,0 | 0,41482  | 2,9 | 0,05384 | 2,0 | 0,72 | 351  | 7  | 352  | 9  | 364  | 45  | <b>96</b>  |
| a101 | 5302   | 881  | 45  | 0,47 | 4850  | 0,05071 | 2,0 | 0,38192  | 3,2 | 0,05462 | 2,5 | 0,62 | 319  | 6  | 328  | 9  | 397  | 55  | 80         |
| a102 | 26864  | 405  | 149 | 0,64 | 23446 | 0,33996 | 2,2 | 5,49659  | 2,6 | 0,11726 | 1,5 | 0,82 | 1886 | 35 | 1900 | 23 | 1915 | 27  | <b>99</b>  |
